# Supplementary material for: Phosphorylation of Guar Gum/Magnetite/Chitosan Nanocomposites for Uranium (VI) Sorption and Antibacterial Applications
Source: PubMed Central journal article supplement (PMC8036802; doi:10.3390/molecules26071920), 2021-03-29
Supplement: molecules-26-01920-s001.pdf [file molecules-26-01920-s001.pdf]

## Phosphorylation of guar gum/magnetite/chitosan nanocomposite for U(VI) sorption and antibacterial applications

Mohammed F. Hamza<sup>1,2</sup>, Amr Fouada<sup>3</sup>, Khalid Z. Elwakeel<sup>4,5</sup>, Yuezhou Wei<sup>1,6\*</sup>, Eric Guibal<sup>7\*</sup>, Nora A. Hamad<sup>8</sup>

<sup>1</sup> Guangxi Key Laboratory of Processing for Non-ferrous Metals and Featured Materials, School of Resources, Environment and Materials, Guangxi University, Nanning 530004, PR China.; [m\\_fouda21@hotmail.com](mailto:m_fouda21@hotmail.com) (MFH) and [yzwei@gxu.edu.cn](mailto:yzwei@gxu.edu.cn) (YW)

<sup>2</sup> Nuclear Materials Authority, POB 530, El-Maadi, Cairo, Egypt.; [m\\_fouda21@hotmail.com](mailto:m_fouda21@hotmail.com) (MFH)

<sup>3</sup> Botany and Microbiology Department, Faculty of Science, Al-Azhar University, Nasr City, Cairo 11884, Egypt; [amr\\_fh83@azhar.edu.eg](mailto:amr_fh83@azhar.edu.eg) (AF)

<sup>4</sup> University of Jeddah, College of Science, Department of Chemistry, Jeddah, Saudi Arabia; [kelwkeel@uj.edu.sa](mailto:kelwkeel@uj.edu.sa) (KZE)

<sup>5</sup> Environmental Science Department, Faculty of Science, Port-Said University, Port-Said, Egypt; [kelwkeel@uj.edu.sa](mailto:kelwkeel@uj.edu.sa) (KZE)

<sup>6</sup> School of Nuclear Science and Engineering, Shanghai Jiao Tong University, Shanghai, China; [yzwei@gxu.edu.cn](mailto:yzwei@gxu.edu.cn) (YW)

<sup>7</sup> Polymers Composites and Hybrids (PCH), IMT Mines Ales, Alès, France; [eric.guibal@mines-ales.fr](mailto:eric.guibal@mines-ales.fr) (EG)

<sup>8</sup> Faculty of Science, Menoufia University, Shebine El-Koam, Egypt; [nhamad059@gmail.com](mailto:nhamad059@gmail.com).

\* Correspondence: [eric.guibal@mines-ales.fr](mailto:eric.guibal@mines-ales.fr) (EG); [yzwei@gxu.edu.cn](mailto:yzwei@gxu.edu.cn) (YW)

**Table S1a.** Reminder on equations used for modeling uptake kinetics [1, 2].

| Model | Equation                                                                                                                                                                                                                                                                                                  | Parameters                                                                                                                                               | Ref. |
|-------|-----------------------------------------------------------------------------------------------------------------------------------------------------------------------------------------------------------------------------------------------------------------------------------------------------------|----------------------------------------------------------------------------------------------------------------------------------------------------------|------|
| PFORE | $q(t) = q_{eq,1}(1 - e^{-k_1 t})$                                                                                                                                                                                                                                                                         | $q_{eq,1}$ (mmol g <sup>-1</sup> ): sorption capacity at equilibrium<br>$k_1$ (min <sup>-1</sup> ): apparent rate constant of PFORE                      | [1]  |
| PSORE | $q(t) = \frac{q_{eq,2}^2 k_2 t}{1 + k_2 q_{eq,2} t}$                                                                                                                                                                                                                                                      | $q_{eq,2}$ (mmol g <sup>-1</sup> ): sorption capacity at equilibrium<br>$k_2$ (g mmol <sup>-1</sup> min <sup>-1</sup> ): apparent rate constant of PSORE | [1]  |
| RIDE  | $\frac{q(t)}{q_{eq}} = 1 - \sum_{n=1}^{\infty} \frac{6\alpha(\alpha + 1)\exp\left(\frac{-D_e q_n^2}{r^2} t\right)}{9 + 9\alpha + q_n^2 \alpha^2}$<br>With $q_n$ being the non-zero roots of<br>$\tan q_n = \frac{3}{3 + \alpha} \frac{q_n}{q_n^2}$ and $\frac{m}{V} \frac{q}{C_0} = \frac{1}{1 + \alpha}$ | $D_e$ (m <sup>2</sup> min <sup>-1</sup> ): Effective diffusivity coefficient                                                                             | [2]  |

(m (g): mass of sorbent; V (L): volume of solution; C<sub>0</sub> (mmol L<sup>-1</sup>): initial concentration of the solution).

**Table S1b.** Reminder on equations used for modeling sorption isotherms [2-4].

| Model      | Equation                                                             | Parameters                                                                                                                             | Ref. |
|------------|----------------------------------------------------------------------|----------------------------------------------------------------------------------------------------------------------------------------|------|
| Langmuir   | $q_{eq} = \frac{q_{m,L}C_{eq}}{1 + b_L C_{eq}}$                      | $q_{m,L}$ (mmol g <sup>-1</sup> ): Sorption capacity at saturation of monolayer<br>$b_L$ (L mmol <sup>-1</sup> ): Affinity coefficient | [3]  |
| Freundlich | $q_{eq} = k_F C_{eq}^{1/n_F}$                                        | $k_F$ and $n_F$ : empirical parameters of Freundlich equation                                                                          | [4]  |
| Sips       | $q_{eq} = \frac{q_{m,S} b_S C_{eq}^{1/n_S}}{1 + b_S C_{eq}^{1/n_S}}$ | $q_{m,S}$ , $b_S$ and $n_S$ : empirical parameters of Sips equation (based on Langmuir and Freundlich equations)                       | [2]  |

Akaike Information Criterion, AIC [5]:

$$AIC = N \ln \left( \frac{\sum_{i=0}^N (y_{i,exp.} - y_{i,model})^2}{N} \right) + 2N_p + \frac{2N_p(N_p + 1)}{N - N_p - 1}$$

Where N is the number of experimental points,  $N_p$  the number of model parameters,  $y_{i,exp.}$  and  $y_{i,model}$  the experimental and calculated values of the tested variable.

**Table S2.** Parameters of the PSORE for the modeling of uptake kinetics for the different sorbents.

| Sorbent   | Agitation mode | $q_{eq,exp.}$<br>(mmol U g <sup>-1</sup> ) | $q_{eq,2}$<br>(mmol U g <sup>-1</sup> ) | $k_2 \times 10$<br>(min <sup>-1</sup> ) | R <sup>2</sup> | AIC  |
|-----------|----------------|--------------------------------------------|-----------------------------------------|-----------------------------------------|----------------|------|
| Chit      | MA             | 0.094                                      | 0.412                                   | 2.92                                    | 0.985          | -134 |
| GG        | MA             | 0.070                                      | 0.098                                   | 4.91                                    | 0.970          | -134 |
| PGG@C #1  | MA             | 0.488                                      | 0.641                                   | 1.23                                    | 0.982          | -92  |
| PGG@C #2  | MA             | 0.481                                      | 0.645                                   | 1.14                                    | 0.975          | -89  |
| MChit     | MA             | 0.065                                      | 0.081                                   | 13.8                                    | 0.961          | -131 |
| MGG       | MA             | 0.062                                      | 0.077                                   | 13.4                                    | 0.975          | -139 |
| PGG@MC #1 | MA             | 0.433                                      | 0.529                                   | 2.45                                    | 0.968          | -89  |
| PGG@MC #2 | MA             | 0.438                                      | 0.544                                   | 2.15                                    | 0.964          | -88  |
| PGG@C     | UT             | 0.501                                      | 0.547                                   | 6.84                                    | 0.980          | -94  |
| PGG@MC    | UT             | 0.397                                      | 0.432                                   | 9.85                                    | 0.959          | -91  |

MA: Mechanical Agitation; UT, Ultrasonic Treatment.

**Table S3.** Parameters of the RIDE (Effective Diffusivity,  $D_e$ ) for the modeling of uptake kinetics for the different sorbents.

| Sorbent   | Agitation mode | $D_e \times 10^{12}$<br>( $m^2 \text{ min}^{-1}$ ) | $R^2$ | AIC  |
|-----------|----------------|----------------------------------------------------|-------|------|
| Chit      | MA             | 11.7                                               | 0.970 | -123 |
| GG        | MA             | 11.6                                               | 0.960 | -133 |
| PGG@C #1  | MA             | 13.3                                               | 0.975 | -86  |
| PGG@C #2  | MA             | 13.3                                               | 0.967 | -83  |
| MChit     | MA             | 5.29                                               | 0.965 | -133 |
| MGG       | MA             | 4.42                                               | 0.977 | -140 |
| PGG@MC #1 | MA             | 4.82                                               | 0.970 | -89  |
| PGG@MC #2 | MA             | 4.56                                               | 0.965 | -87  |
| PGG@C     | UT             | 37.4                                               | 0.989 | -103 |
| PGG@MC    | UT             | 11.4                                               | 0.973 | -98  |

MA: Mechanical Agitation; UT, Ultrasonic Treatment.

**Table S4.** Parameters of the Freundlich equation for the modeling of sorption isotherms for the different sorbents.

| Sorbent   | $k_F$<br>( $\text{mmol}^{1-1/n_F} \text{L}^{1/n_F} \text{g}^{-1}$ ) | $n_F$ | $R^2$ | AIC |
|-----------|---------------------------------------------------------------------|-------|-------|-----|
| Chit      | 0.215                                                               | 1.640 | 0.981 | -87 |
| GG        | 0.185                                                               | 1.572 | 0.969 | -85 |
| PGG@C #1  | 1.449                                                               | 3.984 | 0.859 | -31 |
| PGG@C #2  | 1.419                                                               | 4.106 | 0.869 | -32 |
| MChit     | 0.167                                                               | 1.469 | 0.978 | -90 |
| MGG       | 0.140                                                               | 1.419 | 0.963 | -87 |
| PGG@MC #1 | 1.256                                                               | 3.593 | 0.891 | -36 |
| PGG@MC #2 | 1.255                                                               | 3.530 | 0.890 | -36 |

**Table S5.** Parameters of the Sips equation for the modeling of sorption isotherms for the different sorbents.

| Sorbent   | $q_{m,exp.}$<br>( $\text{mmol U g}^{-1}$ ) | $q_{m,S.}$<br>( $\text{mmol U g}^{-1}$ ) | $bs$<br>( $\text{L mmol}^{-1}$ ) | $ns$  | $R^2$ | AIC |
|-----------|--------------------------------------------|------------------------------------------|----------------------------------|-------|-------|-----|
| Chit      | 0.288                                      | 0.498                                    | 0.830                            | 1.025 | 0.988 | -88 |
| GG        | 0.256                                      | 0.716                                    | 0.361                            | 1.216 | 0.972 | -82 |
| PGG@C #1  | 1.29                                       | 1.28                                     | 158                              | 0.795 | 0.972 | -45 |
| PGG@C #2  | 1.27                                       | 1.29                                     | 63.4                             | 0.941 | 0.966 | -43 |
| MChit     | 0.239                                      | 0.709                                    | 0.318                            | 1.157 | 0.979 | -87 |
| MGG       | 0.203                                      | 0.655                                    | 0.281                            | 1.140 | 0.965 | -84 |
| PGG@MC #1 | 1.16                                       | 1.18                                     | 50.2                             | 0.831 | 0.987 | -55 |
| PGG@MC #2 | 1.15                                       | 1.19                                     | 35.1                             | 0.862 | 0.981 | -51 |

**Table S6.** U(VI) sorption properties of PGG@C and PGG@MC sorbents and alternative sorbents ( $t_{eq}$ : min;  $q_m$ : mmol U g<sup>-1</sup>;  $b_L$ : L mmol<sup>-1</sup>).

| Sorbent                                              | pH   | $t_{eq}$ | $q_{m,exp}$ | $q_{m,L}$ | $b_L$ | Ref.             |
|------------------------------------------------------|------|----------|-------------|-----------|-------|------------------|
| Tulsion CH-96 (in HNO <sub>3</sub> solution)         | 4 M  | 600      | 0.315       | 0.294     | 1.48  | [6]              |
| Magn. phosphine oxide/amino funct. composite         | 0.5  | 180      | 0.714       | 0.826     | 5.48  | [7]              |
| Tri-octylamine impregnated Siplite LX-16 resin       | 1.5  | 60       | 0.390       | 0.403     | 0.93  | [8]              |
| 201 × 8 anion-exchange resin (on leachates)          | 1.57 | 180      | -           | 0.282     | 5.71  | [9]              |
| Purolite A400 (strong base anion-exchanger)          | 1.9  | 480      | -           | 0.494     | 61.9  | [10]             |
| Quinoline-silicate Lewatit resin                     | 2.5  | 30       | 0.870       | 0.913     | 7.78  | [11]             |
| Duolite ES-467                                       | 3    | 90       | -           | 0.326     | 10.9  | [12]             |
| Dowex 50WX8 / Alizarin Red-S                         | 3    | 30       | 0.508       | 0.512     | 141   | [13]             |
| Amberlite IRA-402 (trimethyl ammonium)               | 3    | 120      | -           | 0.894     | 11.9  | [14]             |
| Amberlite GG-400 anion exchange resin                | 3.5  | 360      | -           | 0.240     | 57.2  | [15]             |
| Magnetic <i>Momordica charantia</i> leaf/chitosan    | 5    | 200      | 0.987       | 1.05      | 8.57  | [16]             |
| Cyanobacterial bloom ( <i>Anabaena flos-aquae</i> )  | 5    | 60       | 0.825       | 0.799     | 28.6  | [17]             |
| Trioctyl amine impregnated MnO <sub>2</sub> /zeolite | 4    | 20       | 0.399       | 0.416     | 19.0  | [18]             |
| Aluminum sludge/PVA/sodium alginate                  | 4    | 240      | -           | 0.176     | 249   | [19]             |
| Hydroxypyridone-functionalized PE fabrics            | 4    | 1200     | 0.084       | 0.087     | 119   | [20]             |
| $\alpha$ -aminophosphonate resin                     | 4    | 90       | 1.06        | 1.31      | 7.32  | [21]             |
| Magnetic poly(aminophosphonic) PGMA                  | 4    | 240      | 1.12        | 1.20      | 16.2  | [22]             |
| Magnetic amidoxime-functionalized chitosan           | 4    | 90       | 1.50        | 1.57      | 53.9  | [23]             |
| Methyl- $\alpha$ -aminophosphonate funct. chitosan   | 4    | 120      | 1.12        | 1.35      | 6.64  | [24]             |
| <i>Chit</i>                                          | 4    | 60       | 0.288       | 0.482     | 0.89  |                  |
| <i>MChit</i>                                         | 4    | 60       | 0.239       | 0.494     | 0.54  |                  |
| <i>GG</i>                                            | 4    | 60       | 0.256       | 0.472     | 0.69  |                  |
| <i>MGG</i>                                           | 4    | 60       | 0.203       | 0.457     | 0.47  | <i>This work</i> |
| <i>PGG@C</i>                                         | 4    | 60       | 1.28        | 1.32      | 47.1  |                  |
| <i>PGG@MC</i>                                        | 4    | 60       | 1.15        | 1.22      | 22.0  |                  |
| Montmorillonite/Polyamide 6 composite                | 4.5  | 30       | 0.563       | 0.584     | 9.76  | [25]             |
| $\beta$ -cyclodextrin functionalized silica gel      | 4.5  | 60       | -           | 0.070     | 50.3  | [26]             |
| Chitosan fiber 3D-network                            | 5    | 600      | 0.748       | 0.827     | 223   | [27]             |
| Phosphonic acid functionalized cellulose             | 5    | 35       | 2.63        | 3.00      | 100   | [28]             |
| Amidoxime-functionalized silica microspheres         | 5    | 120      | 1.54        | 1.62      | 225   | [29]             |
| Sugar beet pulp                                      | 5    | 60       | -           | 0.086     | 6.43  | [30]             |
| PEI-modified p(GA-EGMA) microbeads                   | 6    | 120      | 0.369       | 0.373     | 59.0  | [31]             |
| Trimesoyl chloride/Melamine/Palygorskite             | 6    | 75       | 0.588       | 1.16      | 0.95  | [32]             |
| Citric acid-treated <i>Luffa cylindrical</i> fibers  | 6    | 180      | 0.756       | 0.858     | 2.78  | [33]             |
| Nano-hydroxyapatite/Activated carbon/Alginate        | 6    | 420      | 0.044       | 0.078     | 0.95  | [34]             |
| Temperature sensitive urea-formaldehyde resin        | 6    | 300      | 0.399       | 0.416     | 928   | [35]             |
| Carboxymethyl konjac glucomannan/gellan gum          | 6    | 720      | 0.414       | 0.407     | 45.7  | [36]             |
| Bis-amidoxime functionalized marine fungus           | 6    | 110      | 1.56        | 1.56      | 0.38  | [37]             |
| Diethylenetriamine tethered mesoporous silica        | 6    | 180      | 3.87        | 4.48      | 3.95  | [38]             |
| <i>Yarrowia lipolytica</i> /alginate beads           | 7.5  | 60       | -           | 0.102     | 2.86  | [39]             |

**Table S7.** Composition of selected ore (percentage for major compounds, ppm for minors).

| Compound                       | Percentage (%) | Metal ion | Content (ppm) |
|--------------------------------|----------------|-----------|---------------|
| SiO <sub>2</sub>               | 36.81          | U         | 312.57        |
| Al <sub>2</sub> O <sub>3</sub> | 11.97          | Cu        | 215.49        |
| Fe <sub>2</sub> O <sub>3</sub> | 5.33           | Ni        | 98            |
| CaO                            | 3.96           | V         | 105.01        |
| Na <sub>2</sub> O              | 3.31           | Zn        | 735.3         |
| Cl                             | 3.27           | Co        | 37.77         |
| MgO                            | 4.02           | U         | 312.57        |
| K <sub>2</sub> O               | 0.54           |           |               |
| MnO                            | 3.27           |           |               |
| L. O. I                        | 25.88          |           |               |

L.O.I.: loss on ignition.

**Table S8.** Composition of WPS (concentrations, mg L<sup>-1</sup>; natural pH: 6.3) and sorption efficiency (%) at different pH values (using PGG@C and PGG@MC).

| Element | WPS                   |                         | PGG@M            |      |      | PGG@MC           |      |      |
|---------|-----------------------|-------------------------|------------------|------|------|------------------|------|------|
|         |                       |                         | pH <sub>eq</sub> |      |      | pH <sub>eq</sub> |      |      |
|         | (mg L <sup>-1</sup> ) | (μmol L <sup>-1</sup> ) | 2.31             | 3.98 | 5.94 | 2.29             | 3.85 | 5.88 |
| Si(IV)  | 9.957                 | 354.5                   | 10.2             | 32.1 | 39.3 | 9.5              | 24.5 | 38.4 |
| Al(III) | 91.12                 | 3377                    | 2.7              | 12.8 | 16.0 | 1.5              | 10.7 | 13.6 |
| Fe(III) | 69.05                 | 1236                    | 15.1             | 28.4 | 31.8 | 16.2             | 29.1 | 34.0 |
| Ca(II)  | 143.86                | 3589                    | 5.0              | 23.1 | 25.8 | 5.5              | 22.1 | 29.0 |
| Mn(II)  | 28.928                | 526.6                   | 3.4              | 12.1 | 12.9 | 6.9              | 14.1 | 17.1 |
| Ni(II)  | 2.03                  | 34.59                   | 2.0              | 16.7 | 27.1 | 6.4              | 14.3 | 35.0 |
| Cu(II)  | 32.75                 | 515.4                   | 11.9             | 30.8 | 37.2 | 7.4              | 22.0 | 26.9 |
| Zn(II)  | 9.05                  | 85.92                   | 10.9             | 41.5 | 43.4 | 11.4             | 33.8 | 44.7 |
| U(VI)   | 5.62                  | 38.03                   | 29.8             | 81.3 | 88.9 | 20.7             | 67.7 | 83.3 |



**Table S9.** Ionic properties of selected elements (hydrated)

| Element | Structure<br>(a)                                              | Solution-phase<br>electronegativity<br>(b) | Hydrated<br>radius (Å)<br>(a) | Hydrated<br>radius (Å)<br>(c) | $-\Delta G^\circ$<br>(kcal<br>mol <sup>-1</sup> )<br>(b) | Soft-<br>ness<br>$\sigma$<br>(d) |
|---------|---------------------------------------------------------------|--------------------------------------------|-------------------------------|-------------------------------|----------------------------------------------------------|----------------------------------|
| Si(IV)  | -                                                             | -                                          | -                             | -                             | -                                                        | -                                |
| Al(III) | Al(H <sub>2</sub> O) <sub>6</sub> <sup>3+</sup>               | 3.435                                      | 0.535                         | -                             | 1081.5                                                   | 0.31                             |
| Fe(III) | Fe(H <sub>2</sub> O) <sub>6</sub> <sup>3+</sup>               | 3.835                                      | 0.645                         | -                             | 1019.4                                                   | 0.33                             |
| Mg(II)  | Mg(H <sub>2</sub> O) <sub>6</sub> <sup>2+</sup>               | 2.158                                      | 0.72                          | 0.72                          | 437.4                                                    | 0.41                             |
| Ca(II)  | Ca(H <sub>2</sub> O) <sub>8</sub> <sup>2+</sup>               | 1.862                                      | 1.12                          | 1.00                          | 359.7                                                    | 0.66                             |
| Mn(II)  | Mn(H <sub>2</sub> O) <sub>6</sub> <sup>2+</sup>               | 2.458                                      | 0.830                         | 0.82                          | 420.7                                                    | 0.15                             |
| Ni(II)  | Ni(H <sub>2</sub> O) <sub>6</sub> <sup>2+</sup>               | 2.891                                      | 0.690                         | 0.70                          | 473.2                                                    | 0.11                             |
| Cu(II)  | Cu(H <sub>2</sub> O) <sub>6</sub> <sup>2+</sup>               | 2.952                                      | 0.73                          | 0.73                          | 480.4                                                    | 0.38                             |
| Zn(II)  | Zn(H <sub>2</sub> O) <sub>6</sub> <sup>2+</sup>               | 2.796                                      | 0.74                          | 0.75                          | 467.3                                                    | 0.35                             |
| Nd(III) | Nd(H <sub>2</sub> O) <sub>9</sub> <sup>3+</sup>               | 3.085                                      | 1.16                          | 1.16                          | 783.9                                                    | 0.58                             |
| U(VI)   | UO <sub>2</sub> (H <sub>2</sub> O) <sub>5</sub> <sup>2+</sup> | -                                          | 1.08                          | 0.75                          | *                                                        | 0.27                             |

(a): [40]; (b): [41]; (c): [42]; (d): [43]. ;\*: strongly depends on the speciation of uranyl [44].

Xu et al [42] scaled the metal ions in function of an acid softness index expressed as the Gibbs free energy of formation:

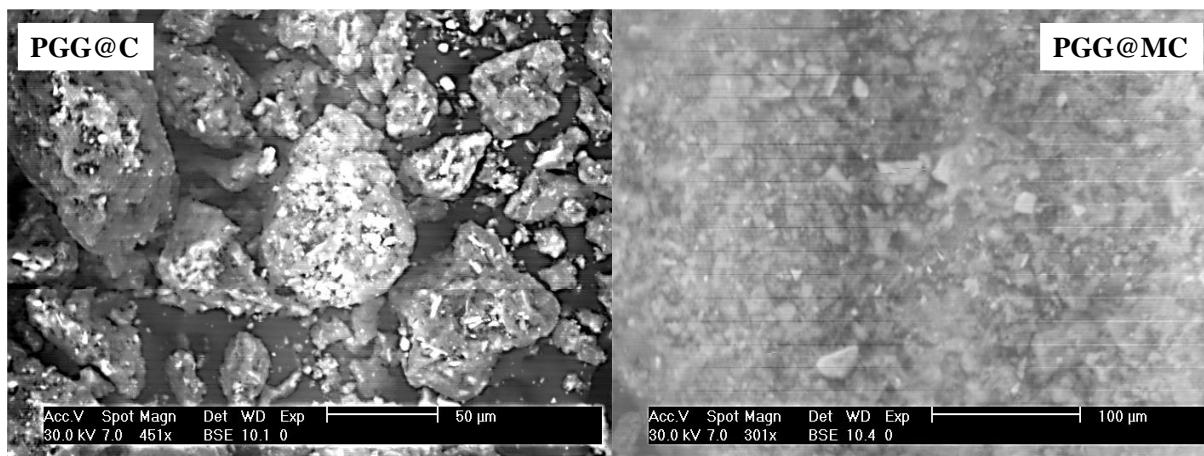

**Figure S1.** SEM images of PGG@C and PGG@MC.

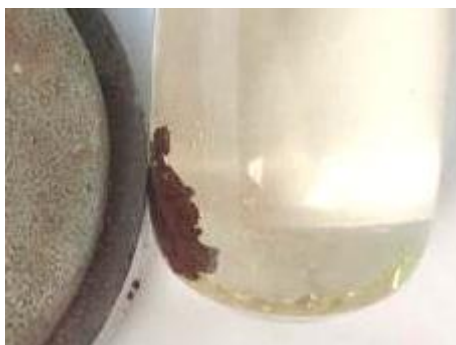

**Magnetic separation**

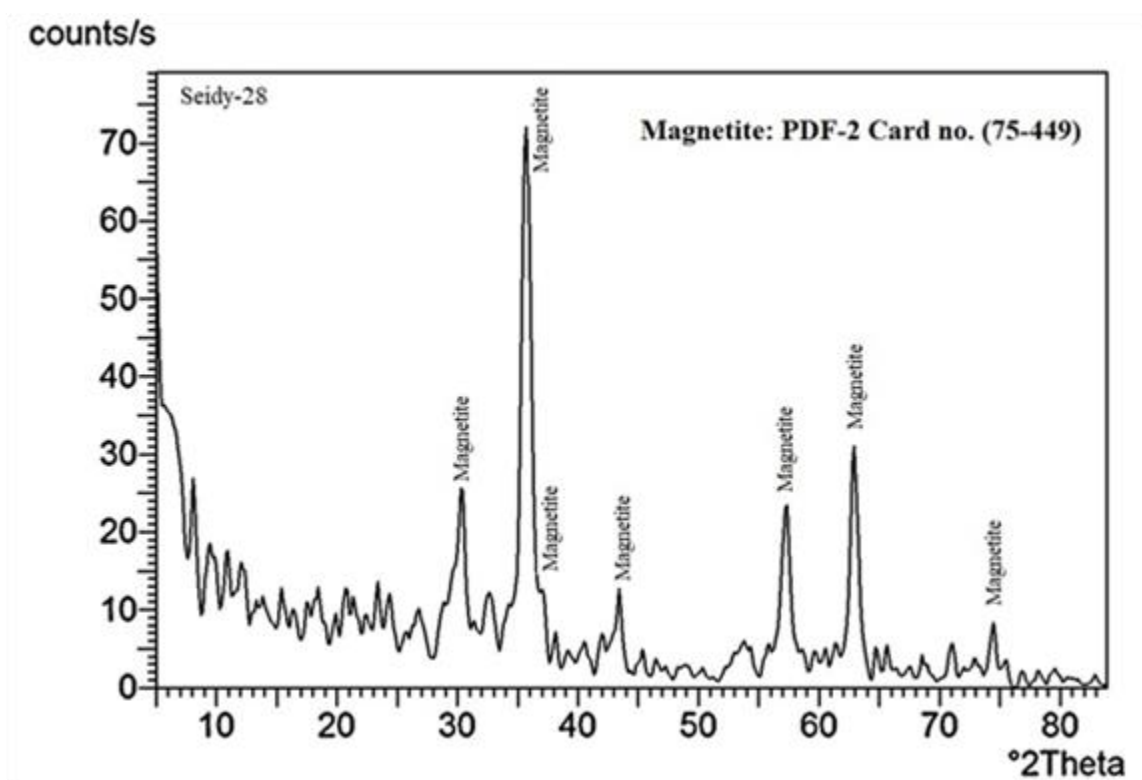

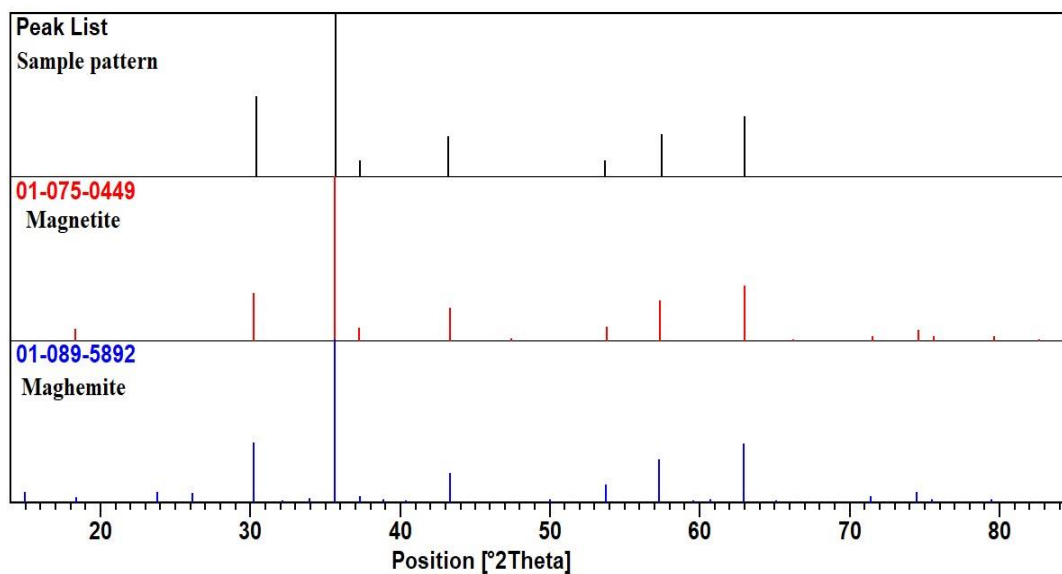

| Sample data         |               |               | Crystal planes | 01-075-0449<br>Magnetite, Fe <sub>3</sub> O <sub>4</sub> |               | 01-089-5892<br>Maghemite |               |
|---------------------|---------------|---------------|----------------|----------------------------------------------------------|---------------|--------------------------|---------------|
| Position [2θ, deg.] | d-spacing [Å] | Rel. Int. [%] |                | d-spacing [Å]                                            | Rel. Int. [%] | d-spacing [Å]            | Rel. Int. [%] |
| 30.3268             | 2.94731       | 35.2          | (220)          | 2.94                                                     | 28            | 2.95                     | 36            |
| 35.6527             | 2.5183        | 100           | (311)          | 2.50                                                     | 100           | 2.50                     | 100           |
| 37.3                | 2.41          | 9.0           | (222)          | 2.41                                                     | 7             | 2.40                     | 3             |
| 43.27               | 2.091         | 15.19         | (400)          | 2.08                                                     | 19            | 2.08                     | 17            |
| 57.5013             | 1.60278       | 15.19         | (511)          | 1.60                                                     | 23            | 1.6                      | 26            |
| 63.0824             | 1.47375       | 40.89         | (440)          | 1.47                                                     | 33            | 1.47                     | 35            |
| 74.4108             | 1.27496       | 15.62         | (533)          | 1.26                                                     | 6             | 1.27                     | 6             |

### XRD analysis

**Figure S2.** Structural characterization of PGG@MC (magnetic behavior) and XRD diffraction patterns.

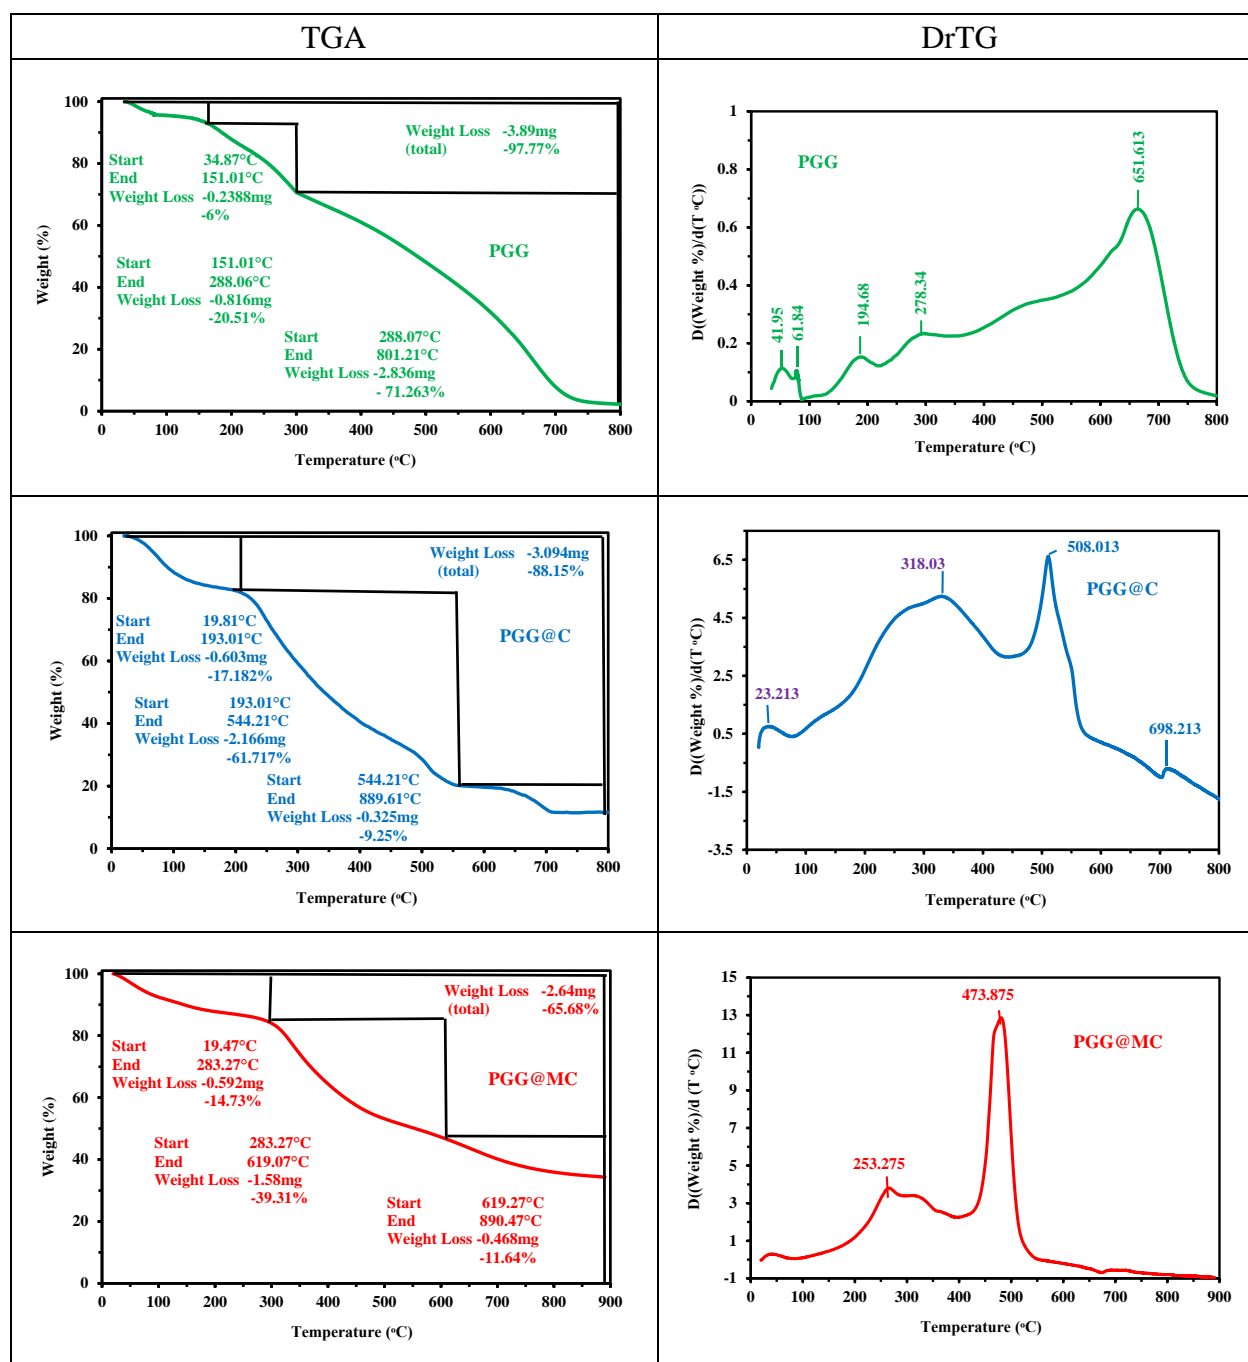

**Figure S3.** Thermogravimetric analysis (TGA and DrTG) of PGG, PGG@C and PGG@MC.

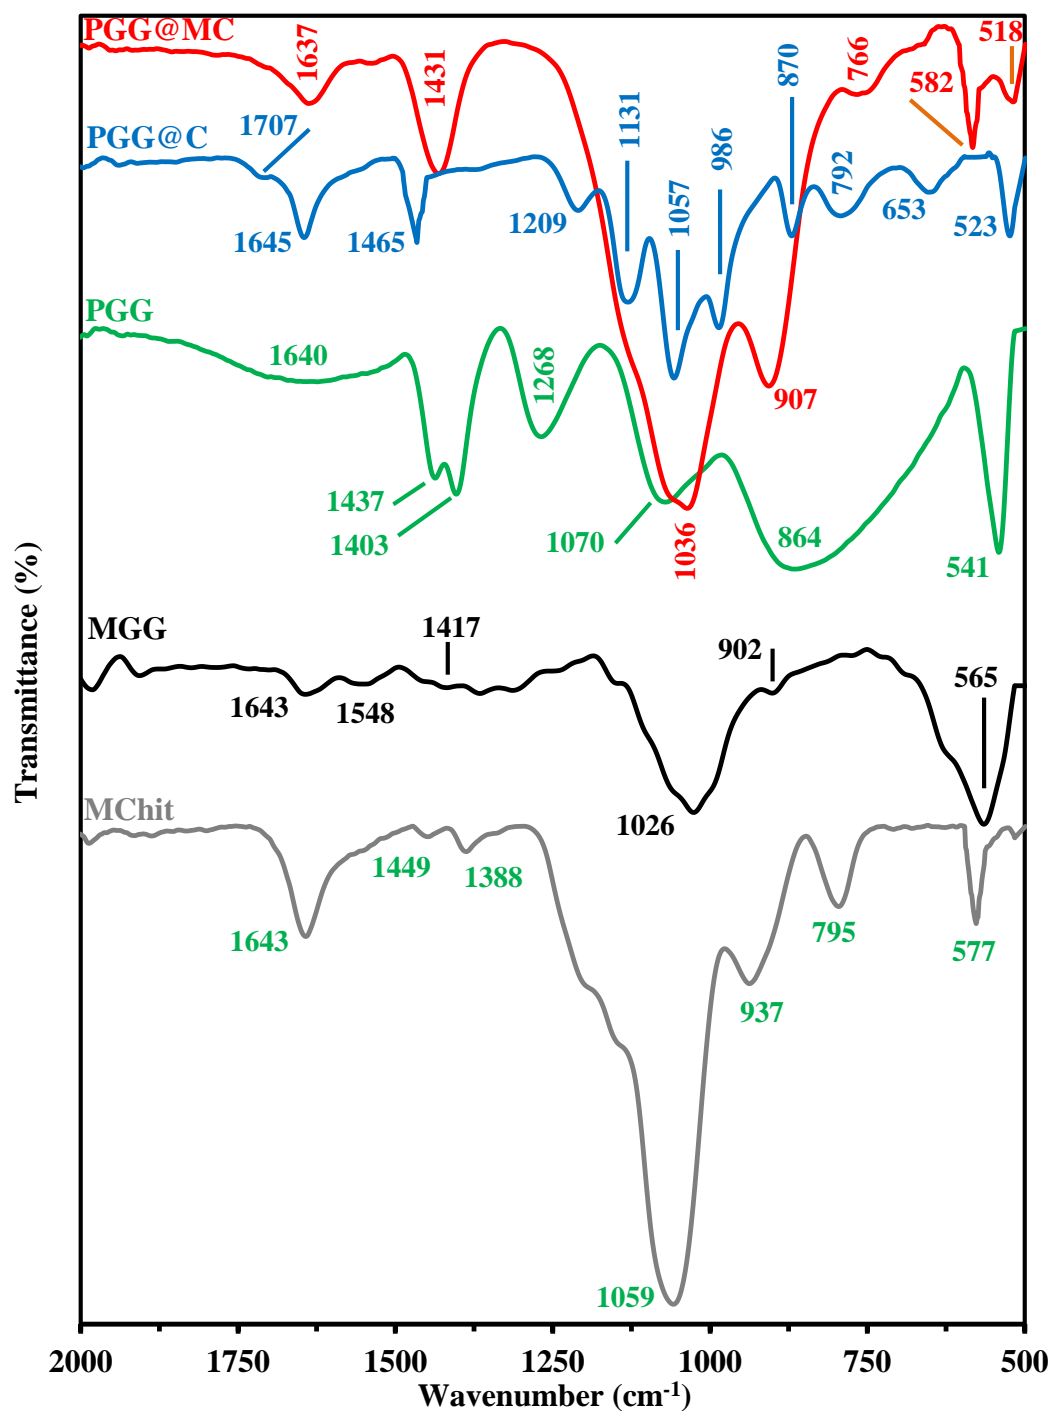

**Figure S4.** FTIR spectra of different functionalized materials and composites (wavenumber range: 2000-500 cm<sup>-1</sup>).

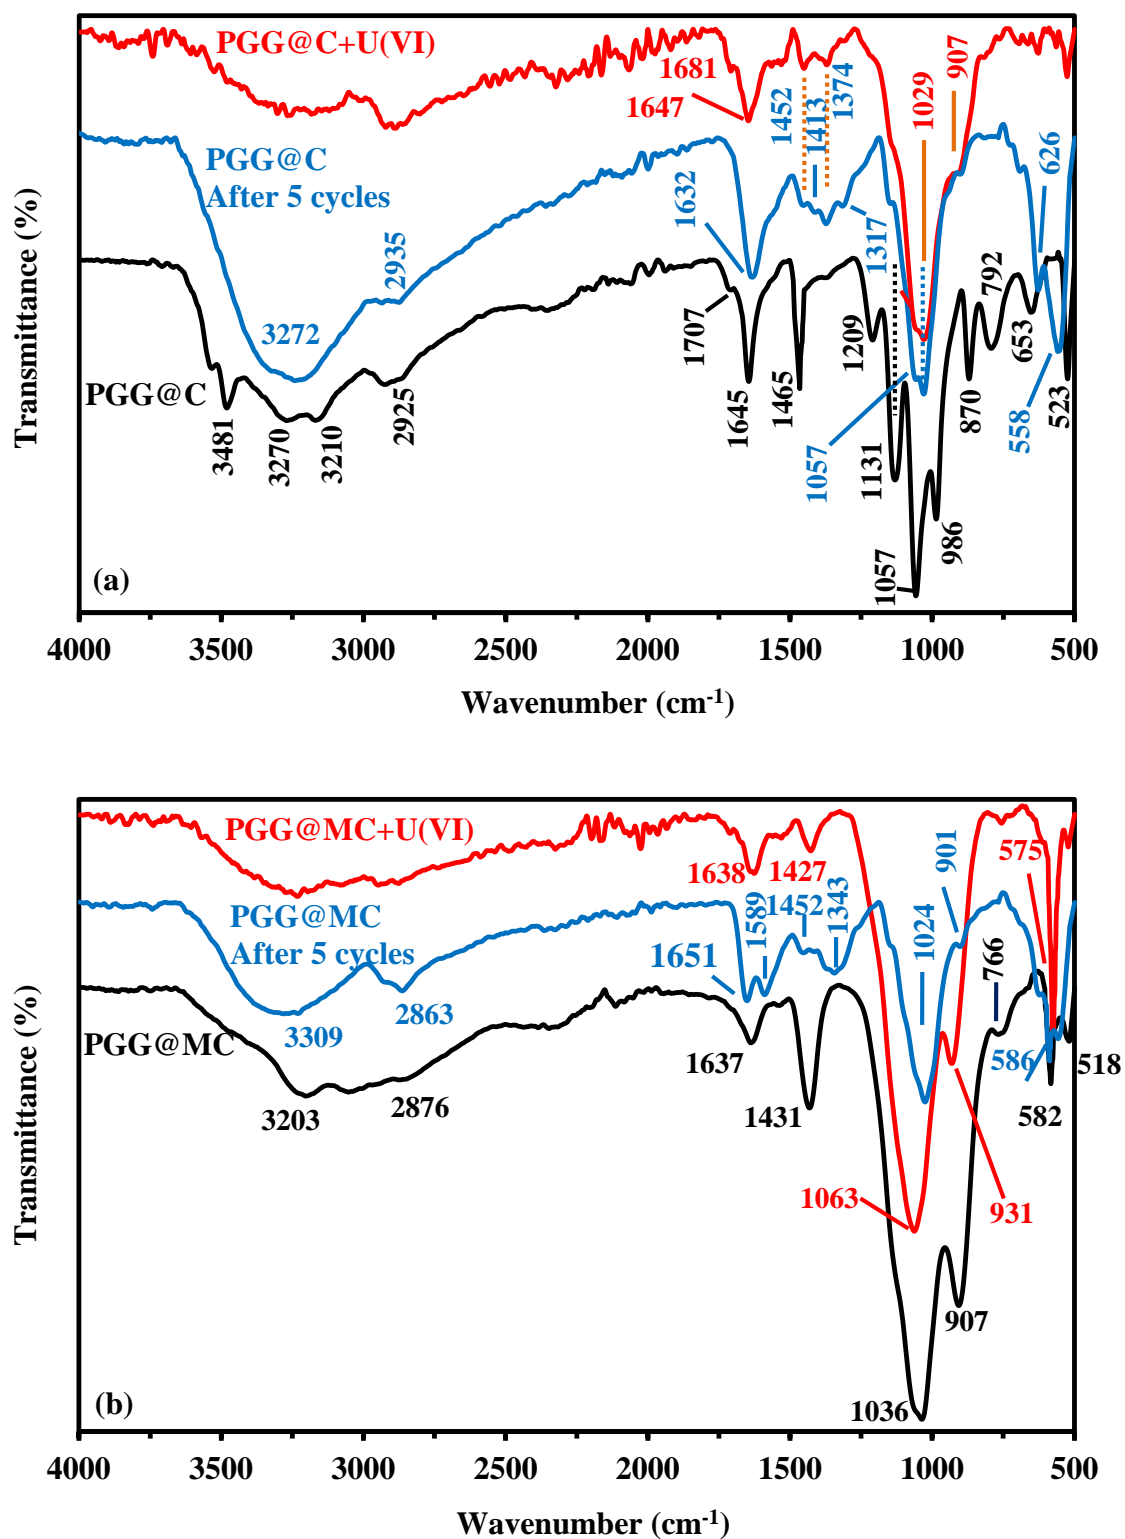

**Figure S5.** FTIR spectra of PGG@C (a) and PGG@MC (b), after U(VI) sorption and after 5 cycles of recycling.

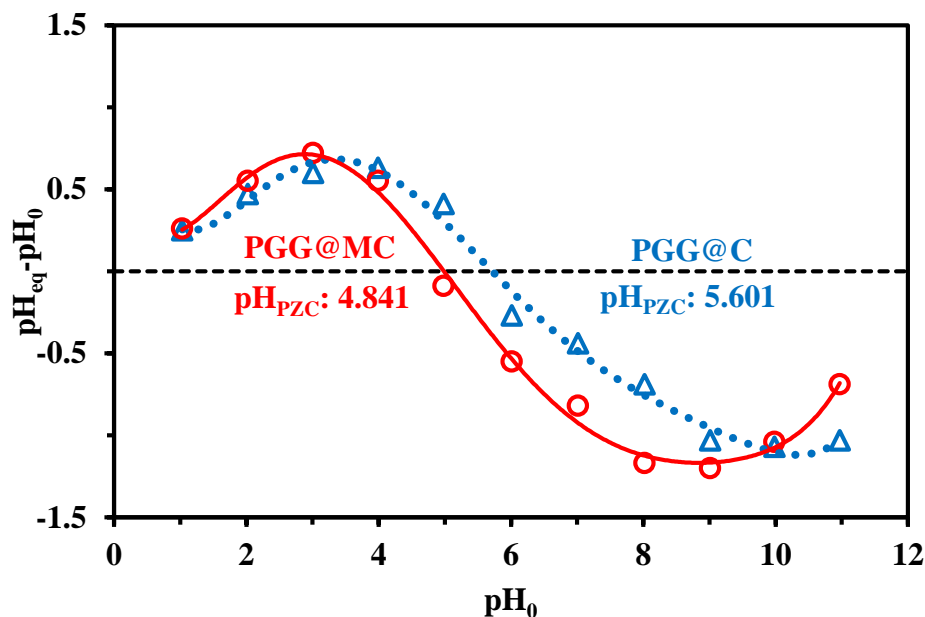

**Figure S6.** Determination of  $pH_{PZC}$  of PGG@C and PGG@MC sorbents (Sorbent dosage, SD:  $2 \text{ g L}^{-1}$ ; Background salt:  $0.1 \text{ M}$ ; Time: 48 h).

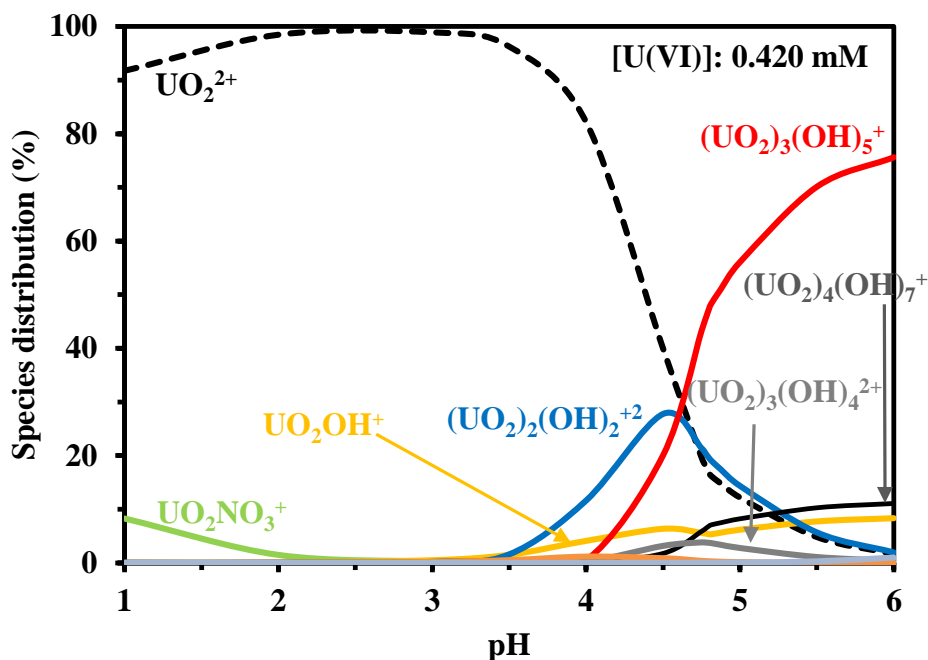

**Figure S7.** U(VI) speciation – Effect of pH (experimental conditions corresponding to the study of pH effect -  $C_0$ :  $0.42 \text{ mmol U L}^{-1}$ ; pH controlled with  $\text{HNO}_3$  or  $\text{NaOH}$ ; precipitation begins above pH 4.8; calculated using Visual Minteq, [45]).



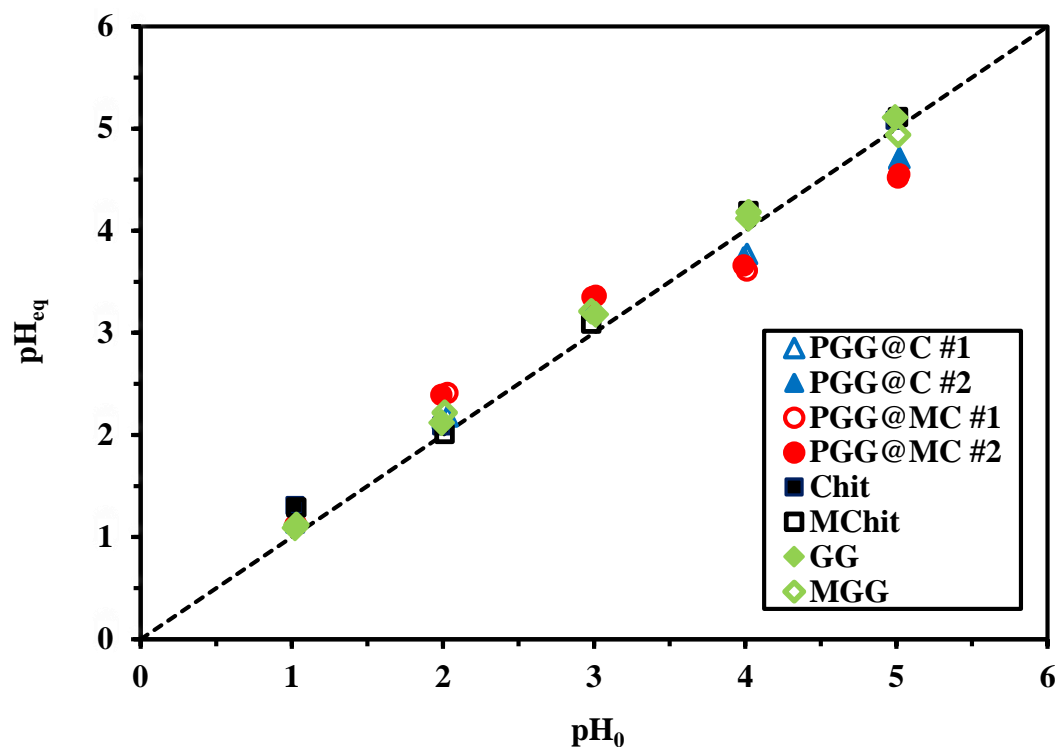

**Figure S8.** pH variation during U(VI) sorption using PGG@C and PGG@MC (and intermediary products: Chit, MChit, GG, and MGG) ( $C_0$ : 0.42 mmol U L<sup>-1</sup>; Sorbent dosage, SD: 833 mg L<sup>-1</sup>; Time: 48 h;  $v$ : 200 rpm;  $T$ : 21 ± 1 °C).

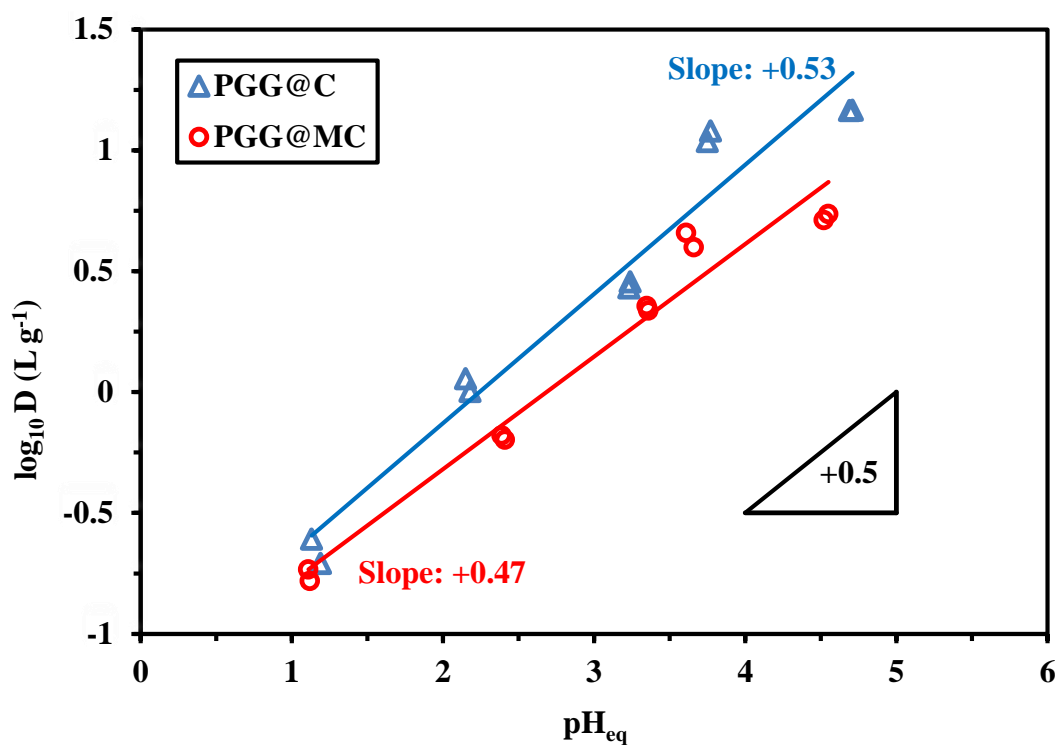

**Figure S9.** Plot of log<sub>10</sub> D (L g<sup>-1</sup>) vs. pH<sub>eq</sub> for U(VI) sorption using PGG@C and PGG@MC.

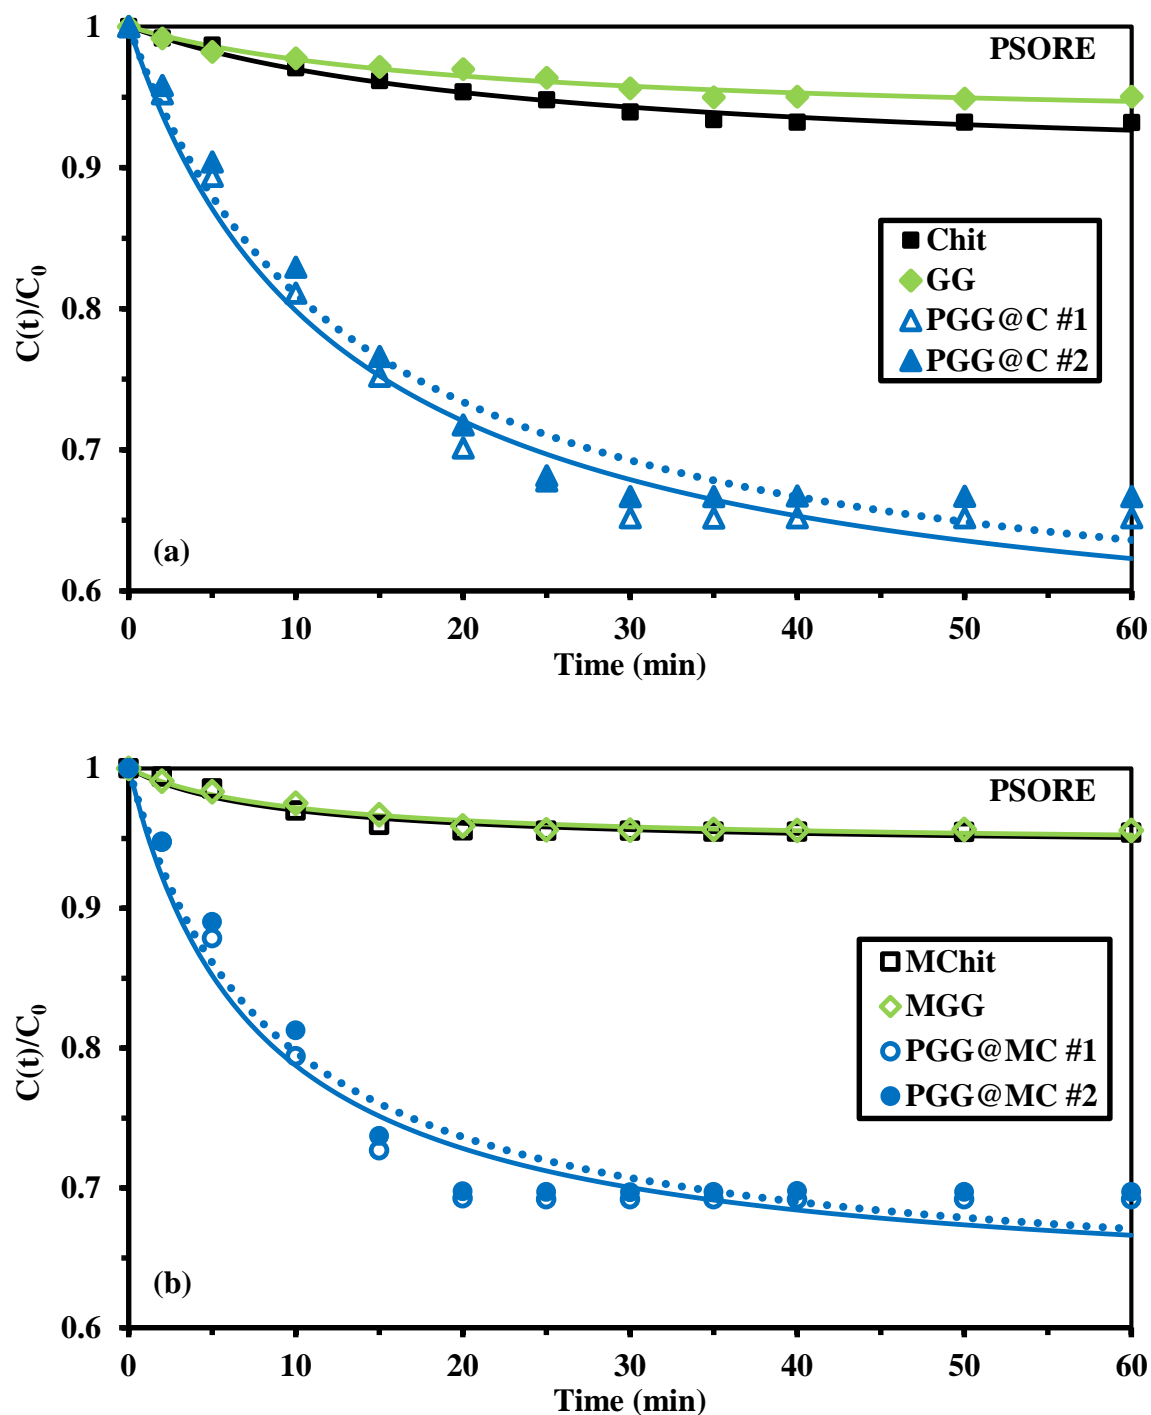

**Figure S10.** U(VI) uptake kinetics using Chit, GG, and PGG@C sorbents: non-magnetic (a) and magnetic (b) sorbents – Modeling with the PSORE ( $C_0$ : 0.42 mmol U L<sup>-1</sup>; pH<sub>0</sub>: 4; Sorbent dosage, SD: 300 mg L<sup>-1</sup>;  $v$ : 200 rpm; T: 21 ± 1 °C).

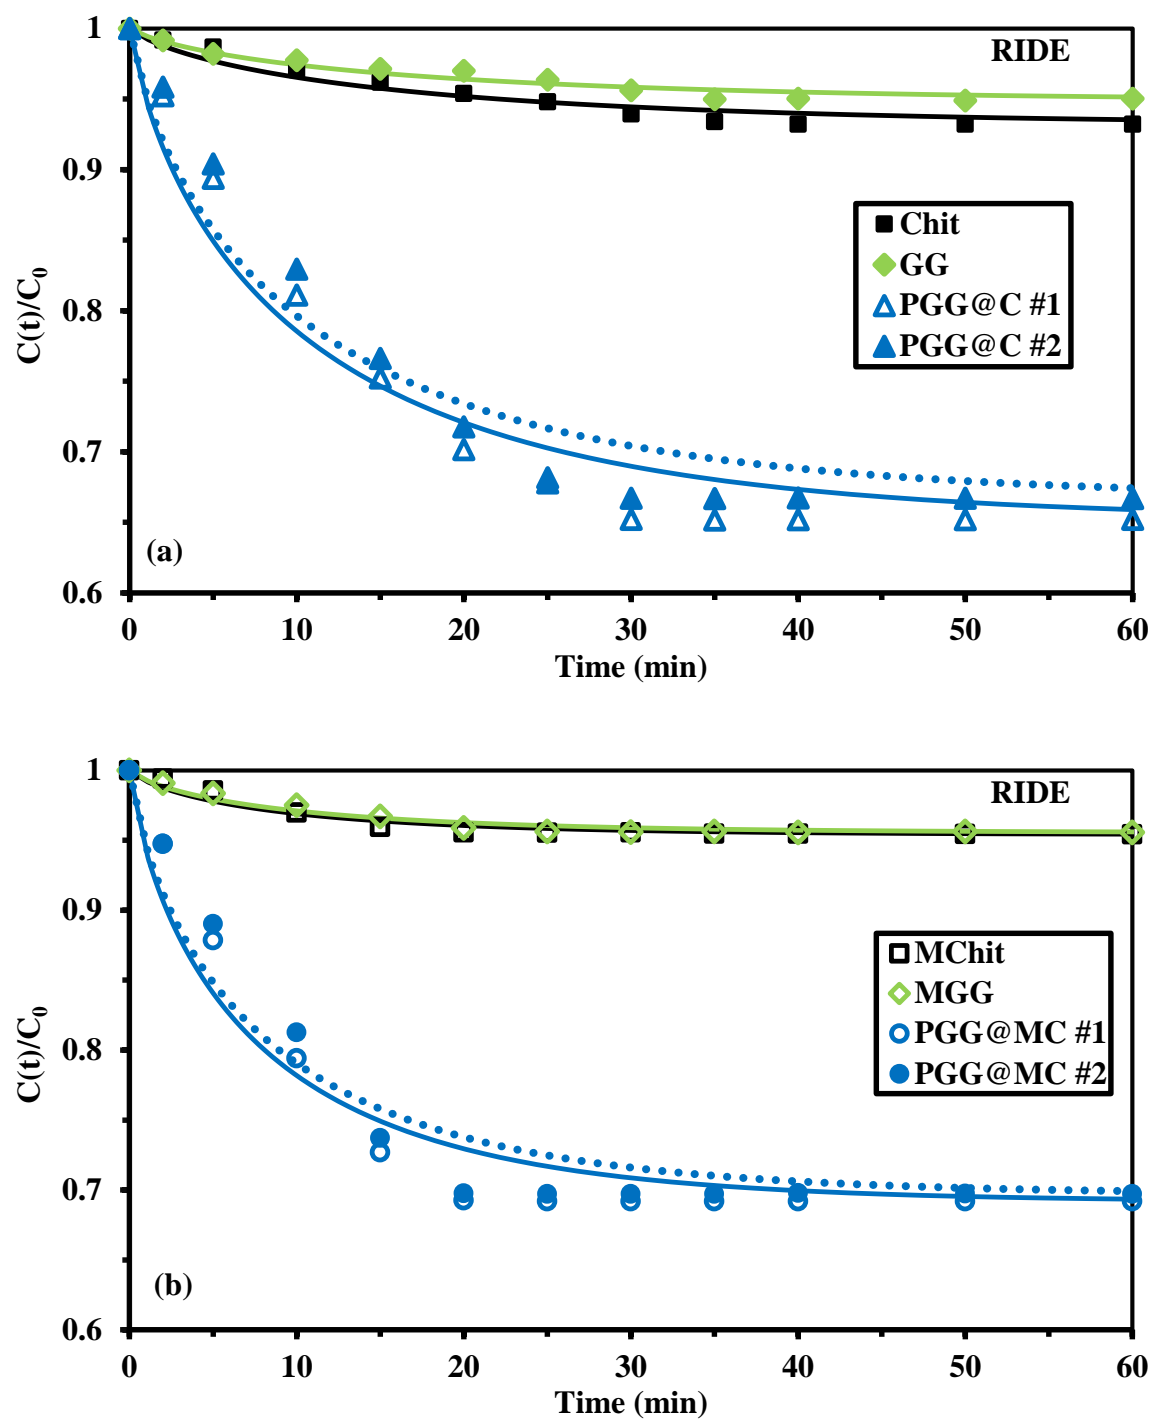

**Figure S11.** U(VI) uptake kinetics using Chit, GG, and PGG@C sorbents: non-magnetic (a) and magnetic (b) sorbents – Modeling with the PSORE ( $C_0$ : 0.42 mmol U L<sup>-1</sup>; pH<sub>0</sub>: 4; Sorbent dosage, SD: 300 mg L<sup>-1</sup>; v: 200 rpm; T: 21 ± 1 °C).

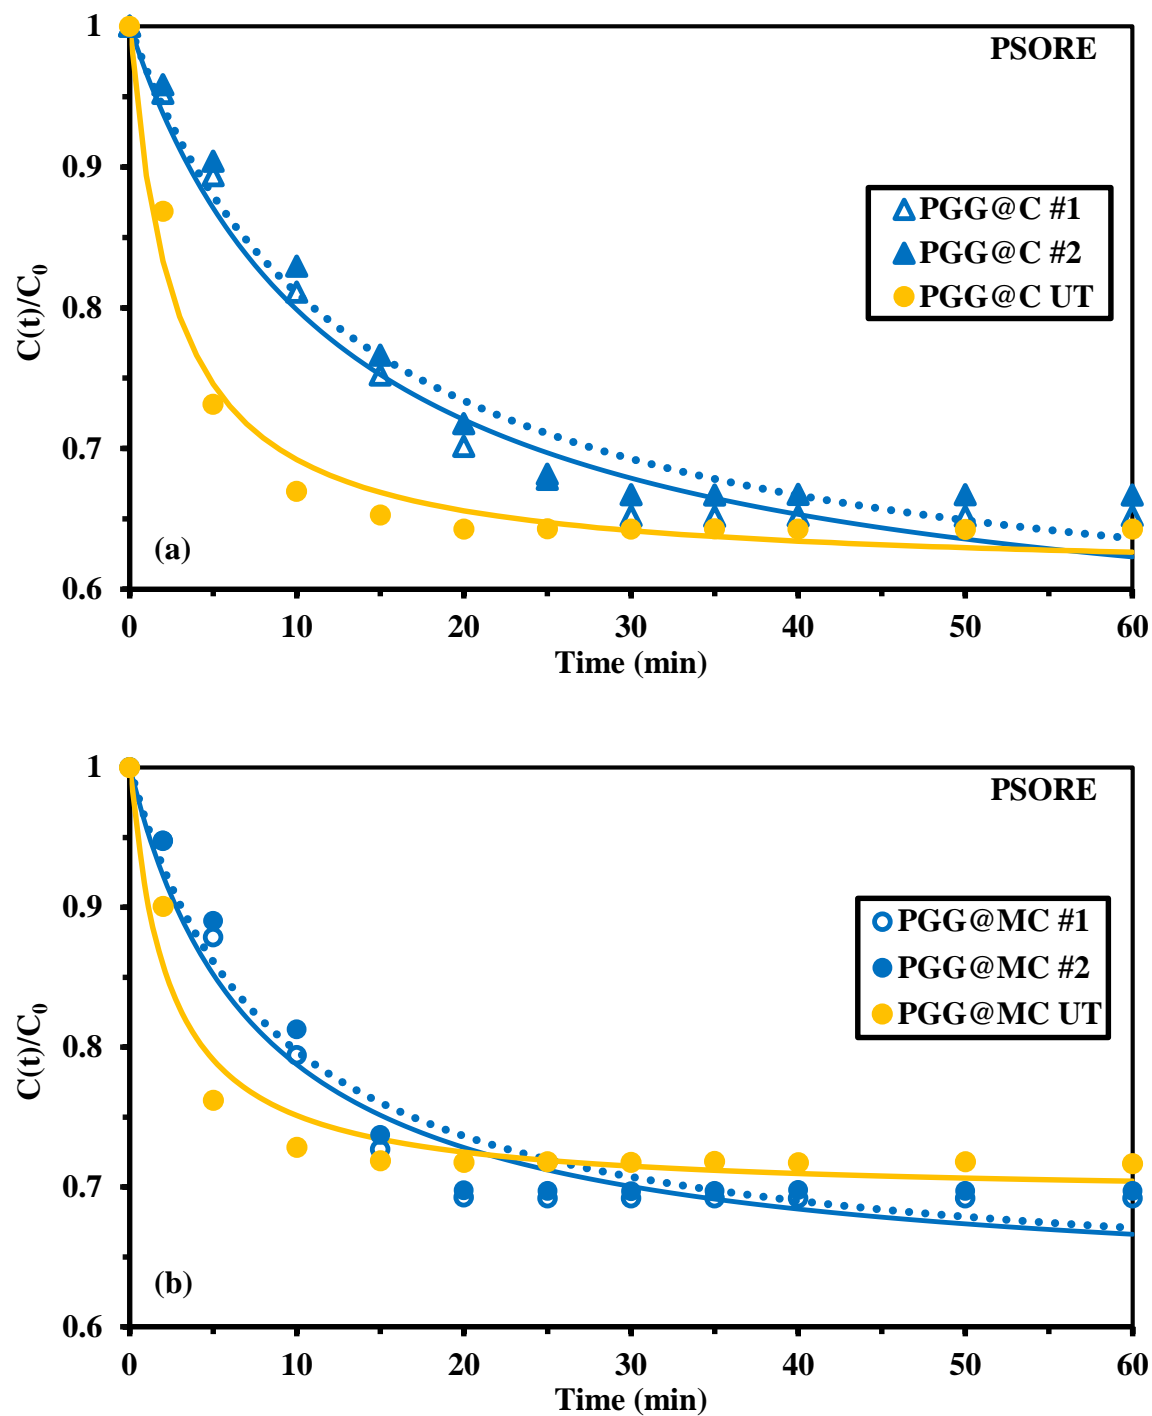

**Figure S12.** Effect of ultrasonic treatment (UT) on U(VI) uptake kinetics using PGG@C (a) and PGG@MC (b) sorbents – Modeling with the PSORE ( $C_0$ : 0.42 mmol U L<sup>-1</sup>; pH<sub>0</sub>: 4; Sorbent dosage, SD: 300 mg L<sup>-1</sup>; v: 200 rpm; T: 21 ± 1 °C).

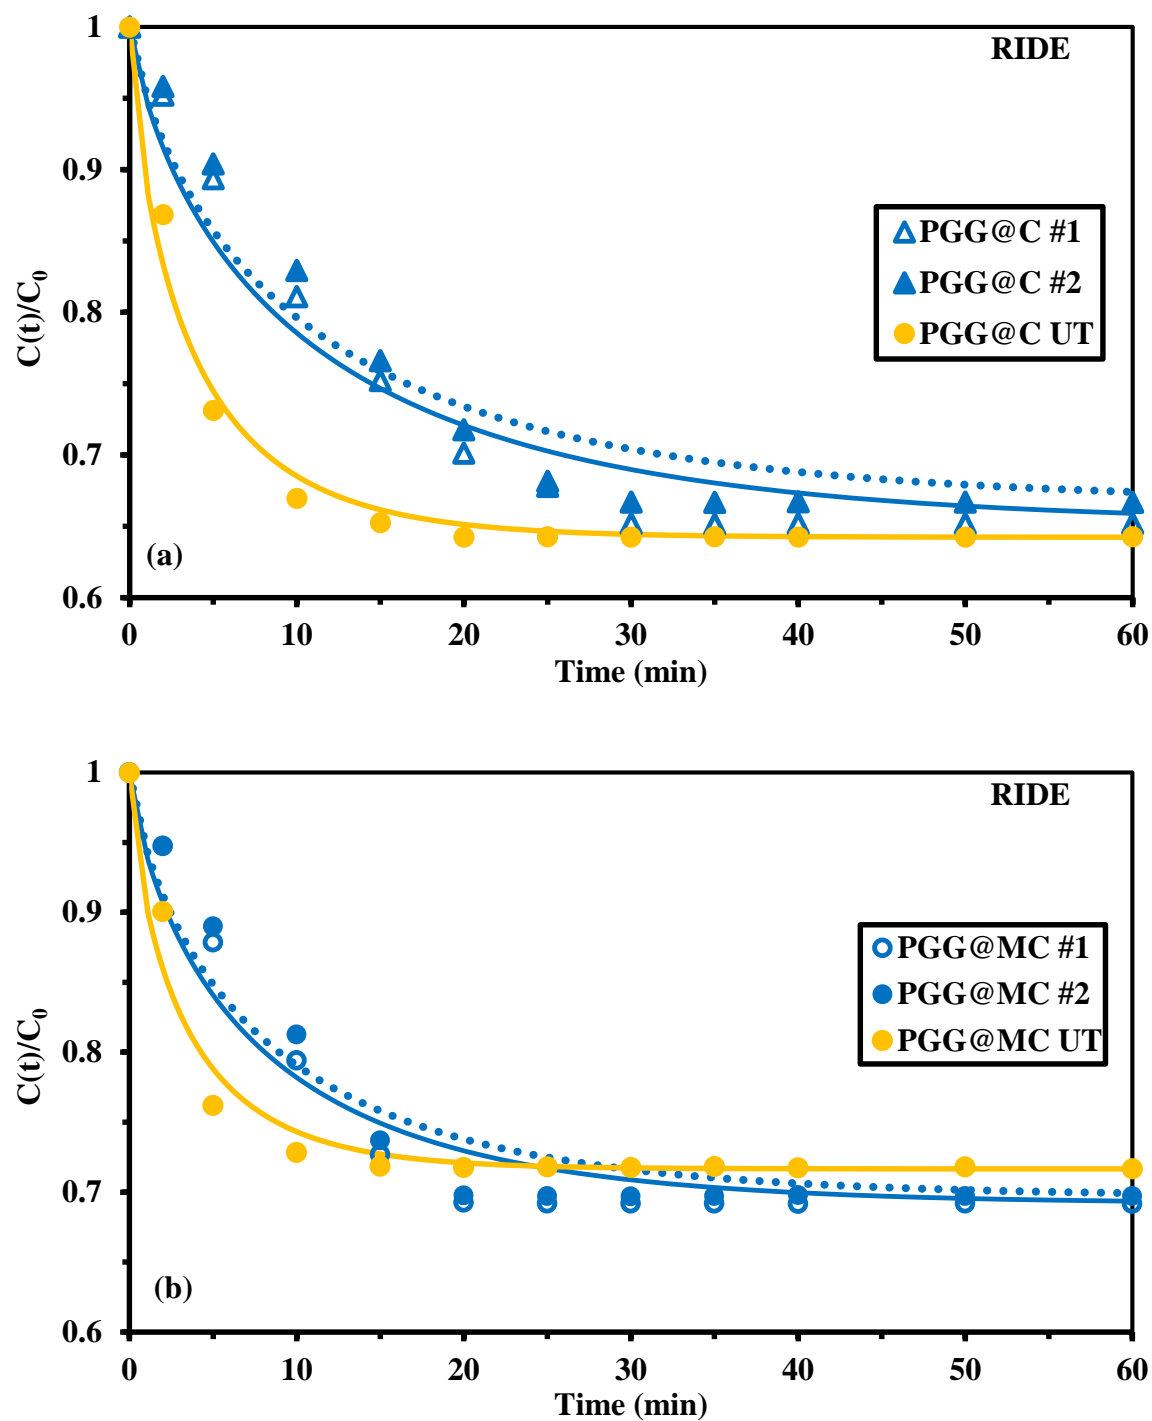

**Figure S13.** Effect of ultrasonic treatment (UT) on U(VI) uptake kinetics using PGG@C (a) and PGG@MC (b) sorbents – Modeling with the RIDE ( $C_0$ : 0.42 mmol U L<sup>-1</sup>; pH<sub>0</sub>: 4; Sorbent dosage, SD: 300 mg L<sup>-1</sup>; v: 200 rpm; T: 21 ± 1 °C).

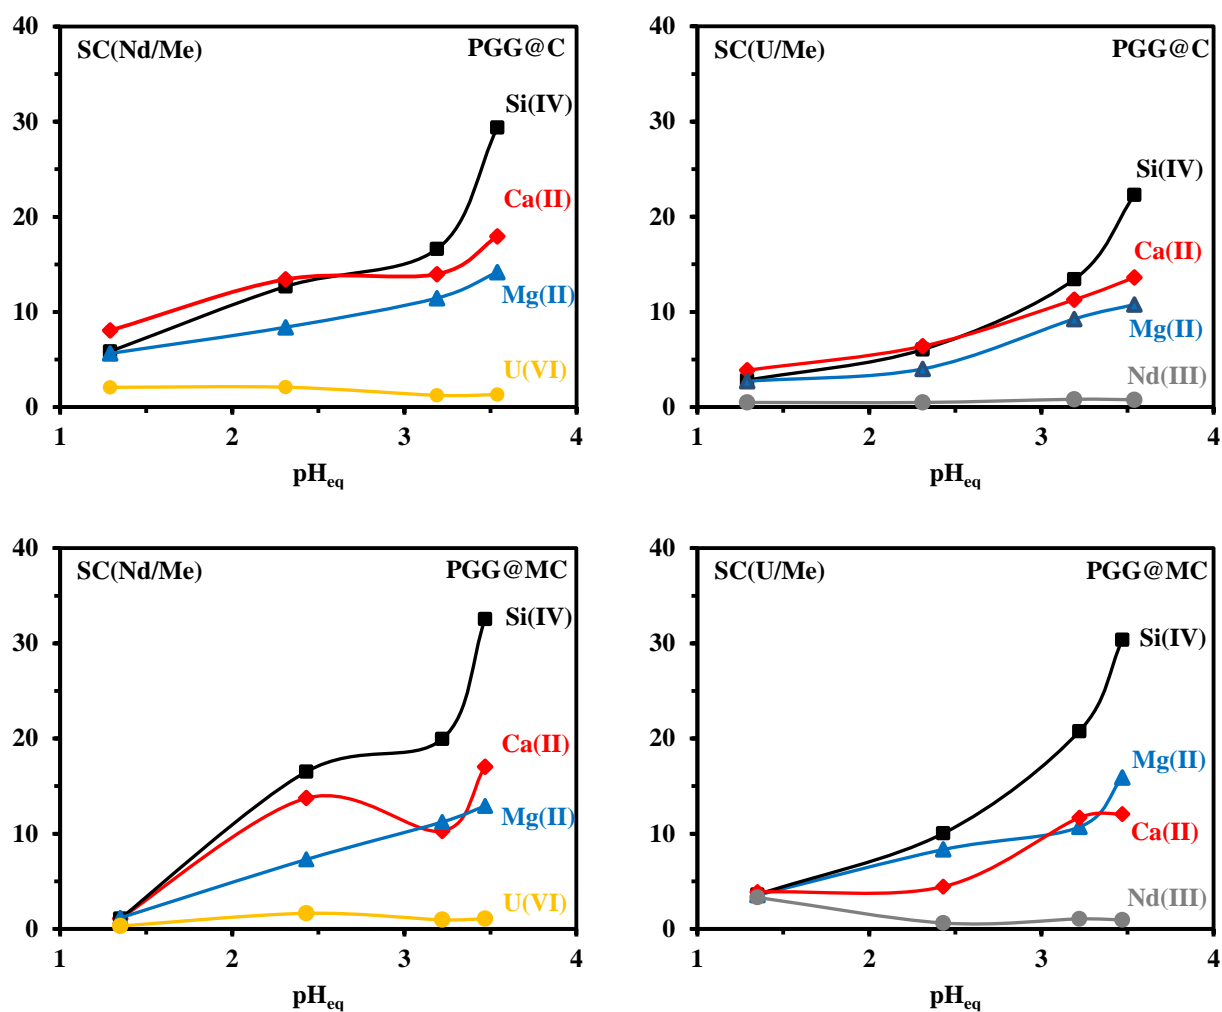

**Figure S14.** Effect of pH on the selectivity coefficients  $SC_{(Nd/Me)}$  and  $SC_{(U/Me)}$  for PGG@C and PGG@MC ( $C_0$ :  $0.5 \text{ mmol L}^{-1}$ ;  $SD$ :  $833 \text{ mg L}^{-1}$ ;  $v$ :  $200 \text{ rpm}$ ;  $T$ :  $21 \pm 1 \text{ }^\circ\text{C}$ ; Time:  $10 \text{ h}$ ).

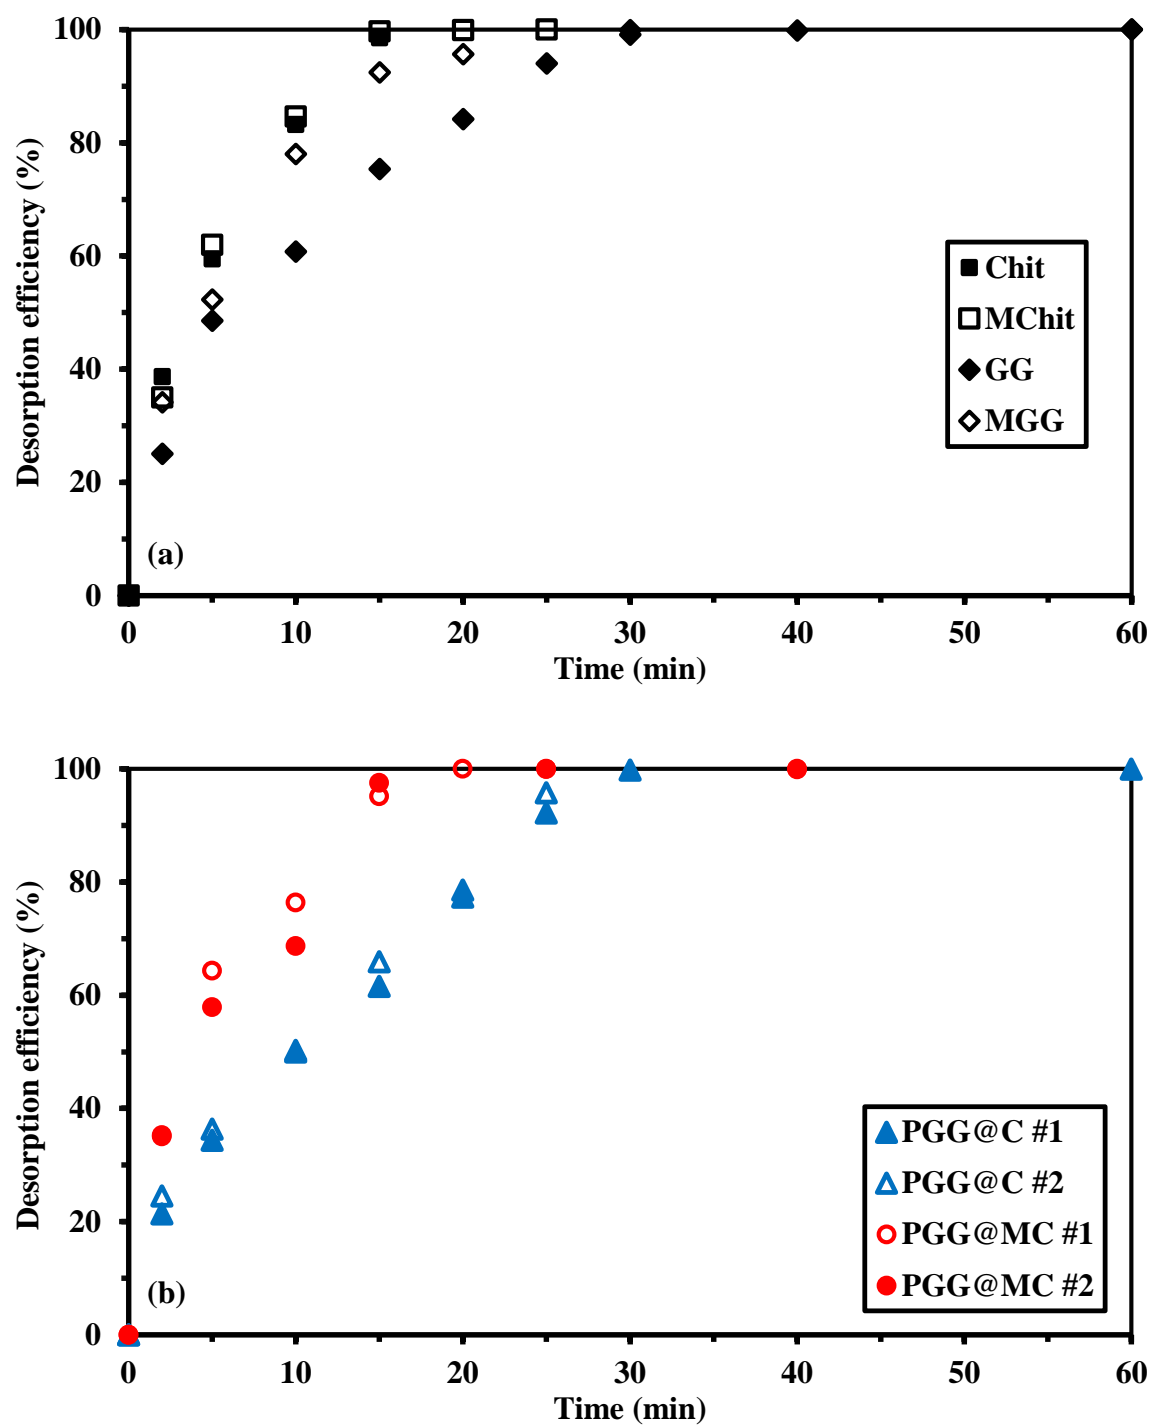

**Figure S15.** Comparison of U(VI) desorption kinetics for selected sorbents (metal-loaded sorbents collected from uptake kinetics; 0.2 M HCl eluent; SD: 1.2 g L<sup>-1</sup>; v: 200 rpm; T: 21 ± 1 °C).

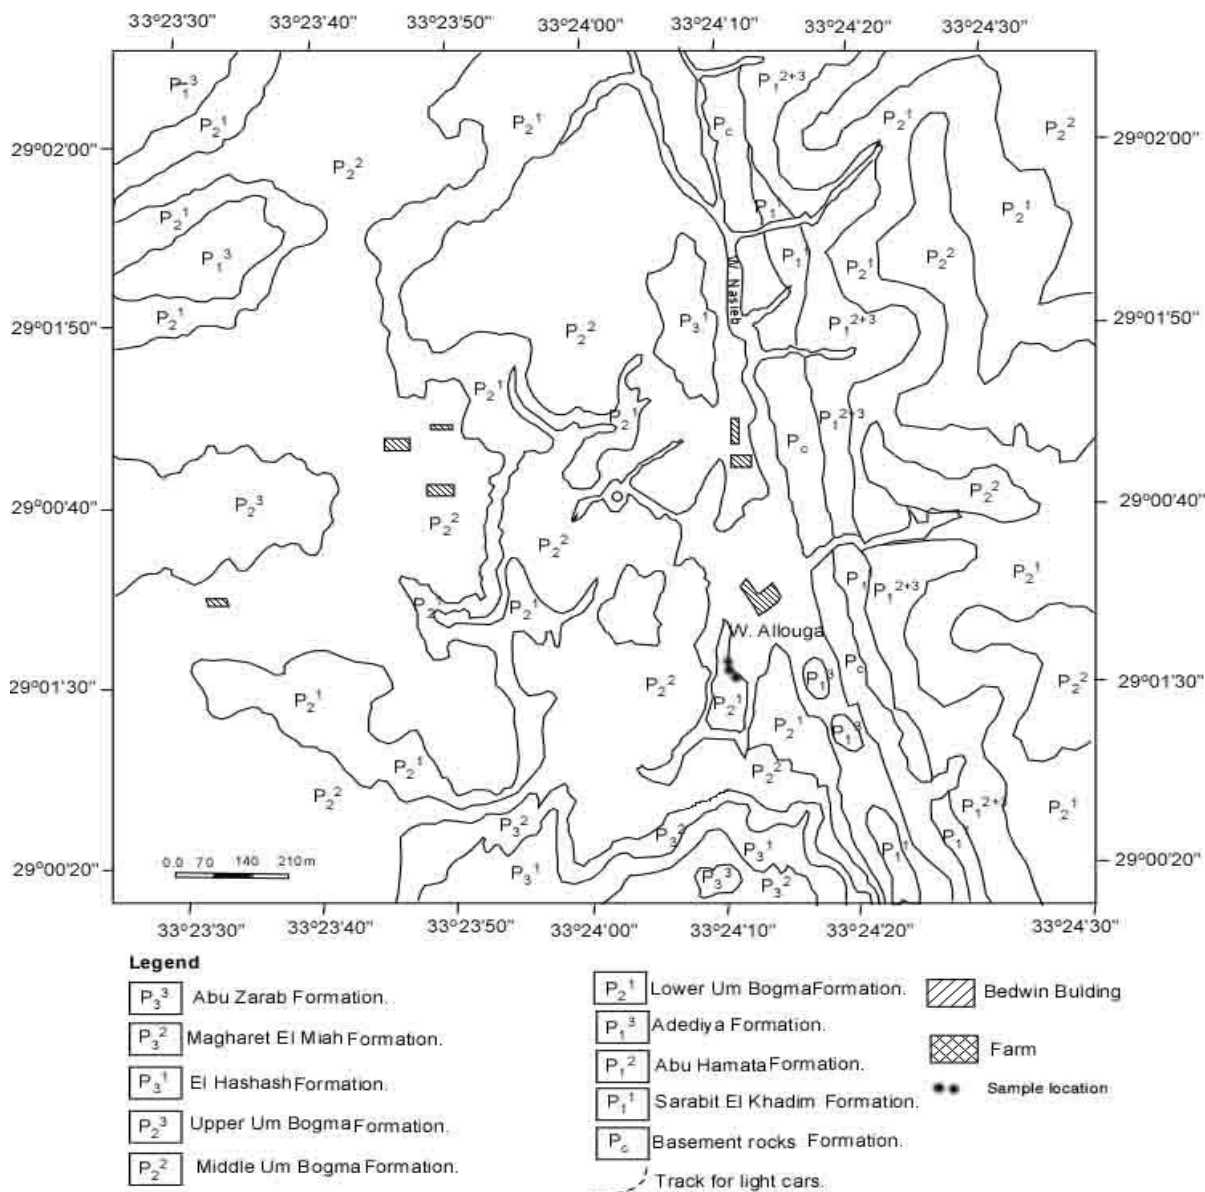

**Figure S16.** Geological and location map of mining area.



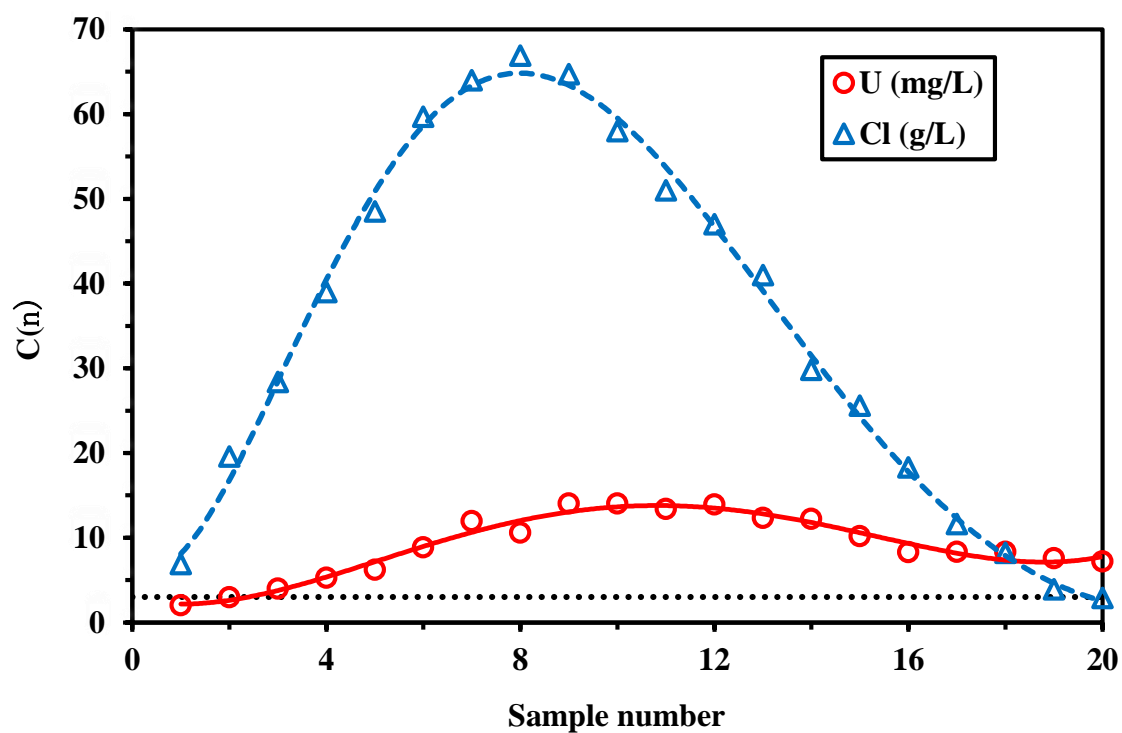

**Figure S17.** Water washing of ore – Evolution of the concentrations of  $Cl^-$  ( $g L^{-1}$ ) and  $U(VI)$  ( $mg L^{-1}$ ) at the outlet of the column (Volume fractions: 20 mL; dot line: outlet  $Cl^-$  concentration:  $3 g L^{-1}$ ).

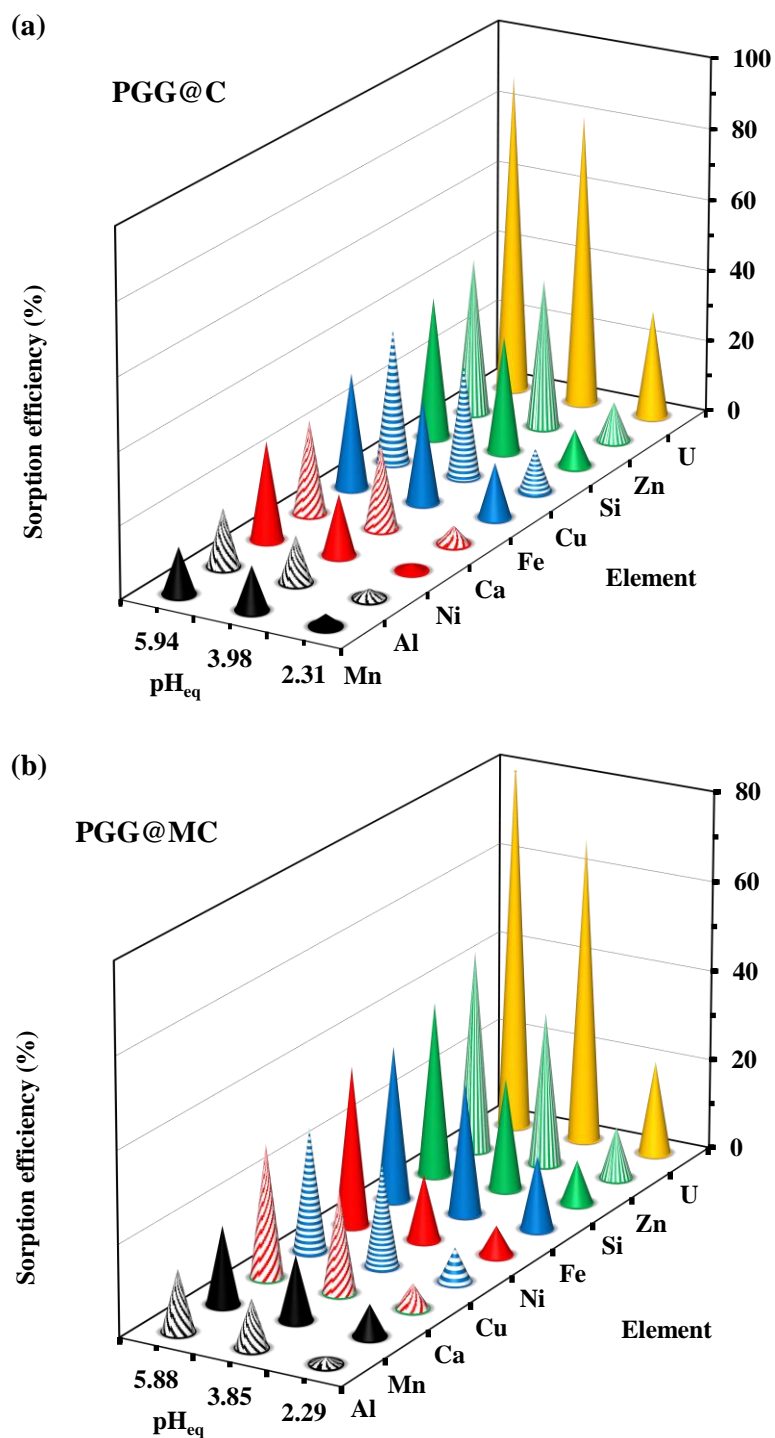

**Figure S18.** Effect of pH<sub>eq</sub> on sorption efficiency (%) for target elements from WPS using PGG@C and PGG@MC.

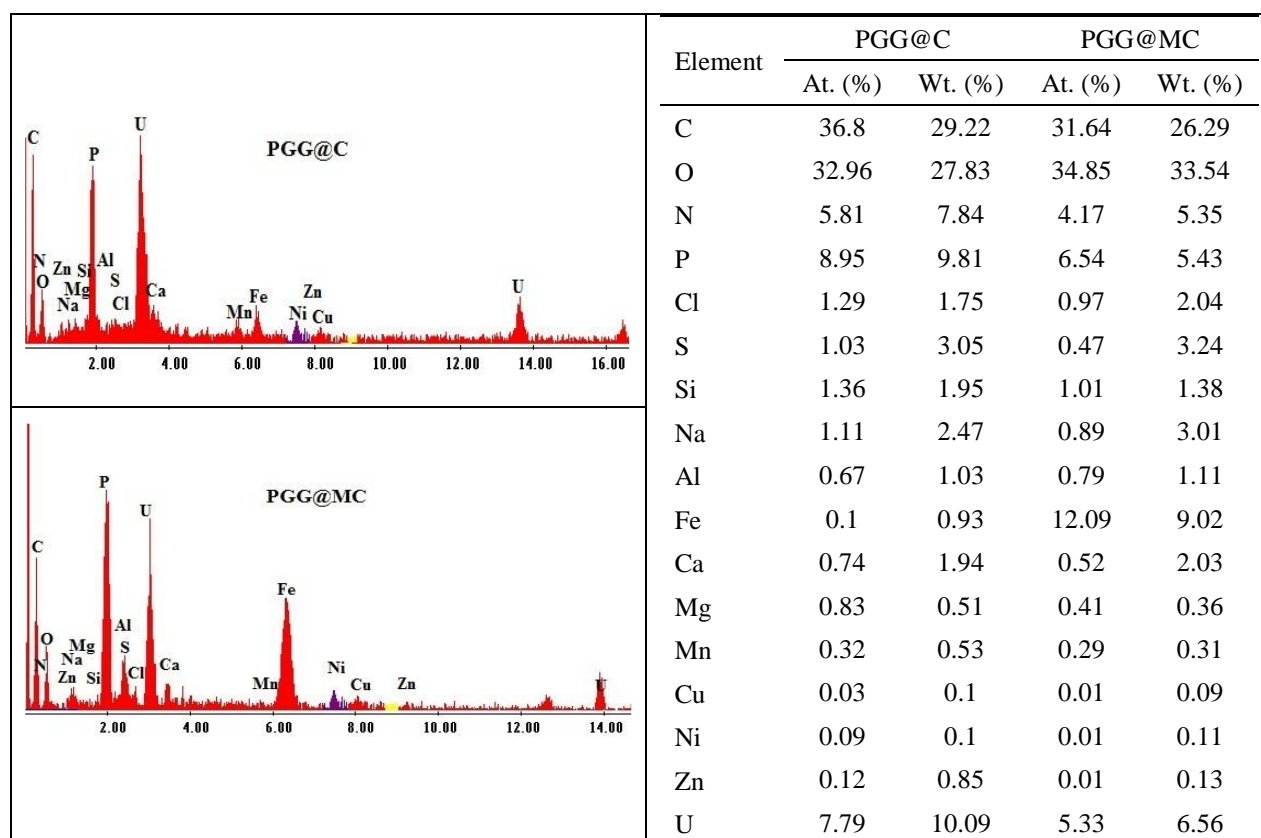

**Figure S19.** Semi-quantitative EDX analyses of PCC@C and PGG@MC after contact with WPS.

## References

- Ho, Y. S.; McKay, G., Pseudo-second order model for sorption processes. *Process Biochem.* **1999**, *34*, (5), 451-465.
- Tien, C., *Adsorption Calculations and Modeling*. Butterworth-Heinemann: Newton, MA, 1994 p 243.
- Langmuir, I., The adsorption of gases on plane surfaces of glass, mica and platinum. *J. Amer. Chem. Soc.* **1918**, *40*, 1361-1402.
- Freundlich, H. M. F., Uber die adsorption in lasungen. *Z. Phys. Chem.* **1906**, *57*, 385-470.
- Nayak, A. K.; Pal, A., Development and validation of an adsorption kinetic model at solid-liquid interface using normalized Gudermannian function. *J. Mol. Liq.* **2019**, *276*, 67-77.
- Venkatesan, K. A.; Shyamala, K. V.; Antony, M. P.; Srinivasan, T. G.; Rao, P. R. V., Batch and dynamic extraction of uranium(VI) from nitric acid medium by commercial phosphinic acid resin, Tulsion CH-96. *J. Radioanal. Nucl. Chem.* **2008**, *275*, (3), 563-570.
- Zhang, S.; Yuan, D.; Zhang, Q.; Wang, Y.; Liu, Y.; Zhao, J.; Chen, B., Highly efficient removal of uranium from highly acidic media achieved using a phosphine oxide and amino functionalized superparamagnetic composite polymer adsorbent. *J. Mater. Chem. A* **2020**, *8*, (21), 10925-10934.
- Mosleh, M. A.; El-Hakim, E. H.; Ahmed, A. Z.; Abd El-Ghany, M. S.; El-Didamony, A. M., Equilibrium and kinetic studies on uranium sorption from aqueous sulphate medium using tri-n-octylamine impregnated resin. *Int. J. Environ. Anal. Chem.* **2020**, Art. N° 1766038.
- Wen, Z.; Huang, K.; Niu, Y.; Yao, Y.; Wang, S.; Cao, Z.; Zhong, H., Kinetic study of ultrasonic-assisted uranium adsorption by anion exchange resin. *Colloids Surf., A* **2020**, *585*, Art. N° 124021.
- Masoud, A. M., Sorption behavior of uranium from sulfate media using purolite A400 as a strong base anion exchange resin. *Int. J. Environ. Anal. Chem.* **2020**, Doi: 10.1080/03067319.2020.1763974.
- Ahmad, A. A., Kinetics of uranium adsorption from sulfate medium by a commercial anion exchanger modified with quinoline and silicate. *J. Radioanal. Nucl. Chem.* **2020**, *324*, (3), 1387-1403.
- Zidan, I. H.; Cheira, M. F.; Bakry, A. R.; Atia, B. M., Potentiality of uranium recovery from G.Gattar leach liquor using Duolite ES-467 chelating resin: Kinetic, thermodynamic and isotherm features. *Int. J. Environ. Anal. Chem.* **2020**, Art. N° 1748613.

13. Yousef, L. A.; Ahmad, A. A.; Bakry, A. R., Separation of uranium ions from acetate medium by Dowex50WX8/Alizarin Red-S and its application on granitic samples, South Um Tawat, Eastern Desert. *Int. J. Environ. Anal. Chem.* **2020**, Doi: 10.1080/03067319.2020.1772771.
14. Solgy, M.; Taghizadeh, M.; Ghoddocynejad, D., Adsorption of uranium(VI) from sulphate solutions using Amberlite IRA-402 resin: Equilibrium, kinetics and thermodynamics study. *Ann. Nucl. Energy* **2015**, *75*, 132-138.
15. Semnani, F.; Asadi, Z.; Samadfam, M.; Sepehrian, H., Uranium(VI) sorption behavior onto amberlite CG-400 anion exchange resin: Effects of pH, contact time, temperature and presence of phosphate. *Ann. Nucl. Energy* **2012**, *48*, 21-24.
16. Yuvaraja, G.; Su, M.; Chen, D.-Y.; Pang, Y.; Kong, L.-J.; Subbaiah, M. V.; Wen, J.-C.; Reddy, G. M., Impregnation of magnetic - *Momordica charantia* leaf powder into chitosan for the removal of U(VI) from aqueous and polluted wastewater. *Int. J. Biol. Macromol.* **2020**, *149*, 127-139.
17. Yuan, Y.; Liu, N.; Dai, Y.; Wang, B.; Liu, Y.; Chen, C.; Huang, D., Effective biosorption of uranium from aqueous solution by cyanobacterium *Anabaena flos-aquae*. *Environ. Sci. Pollut. Res.* **2020**, *27*, 44306-44313.
18. Yousef, L. A.; Bakry, A. R.; Ahmad, A. A., Uranium(VI) recovery from acidic leach liquor using manganese oxide coated zeolite (MOCZ) modified with amine. *J. Radioanal. Nucl. Chem.* **2020**, *324*, (1), 409-421.
19. Yang, J.-h.; Lei, Z.-j.; Dai, Y.-h.; Luo, Y.; Xie, S.-b.; Wang, J.-s.; Zhou, S.-k.; Wei, B.; Li, C.; Hu, S.-q., Preparation of aluminum sludge composite gel spheres and adsorption of U(IV) from aqueous solution. *Environ. Sci. Pollut. Res.* **2020**, *27*, (21), 26835-26844.
20. Zhang, M.; Yuan, M.; Zhang, M.; Wang, M.; Chen, J.; Li, R.; Qiu, L.; Feng, X.; Hu, J.; Wu, G., Efficient removal of uranium from diluted aqueous solution with hydroxypyridone functionalized polyethylene nonwoven fabrics. *Radiat. Phys. Chem.* **2020**, *171*, Art. N° 108742.
21. Rashad, M. M.; El-Sayed, I. E.; Galhoum, A. A.; Abdeen, M. M.; Mira, H. I.; Elshehy, E. A.; Zhang, S.; Lu, X.; Xin, J.; Guibal, E., Synthesis of  $\alpha$ -aminophosphonate based sorbents – Influence of inserted groups (carboxylic vs. amine) on uranyl sorption. *Chem. Eng. J.* **2020**, Art. N° 127830.
22. Galhoum, A. A.; Eisa, W. H.; El-Sayed, I. E.-T.; Tolba, A. A.; Shalaby, Z. M.; Mohamady, S. I.; Muhammad, S. S.; Hussien, S. S.; Akashi, T.; Guibal, E., A new route for manufacturing poly(aminophosphonic)-functionalized poly(glycidyl methacrylate)-magnetic nanocomposite - Application to uranium sorption from ore leachate. *Environ. Pollut.* **2020**, *264*, Art. N° 114797.
23. Hamza, M. F.; Roux, J.-C.; Guibal, E., Uranium and europium sorption on amidoxime-functionalized magnetic chitosan micro-particles. *Chem. Eng. J.* **2018**, *344*, 124-137.
24. Imam, E. A.; El-Tantawy El-Sayed, I.; Mahfouz, M. G.; Tolba, A. A.; Akashi, T.; Galhoum, A. A.; Guibal, E., Synthesis of  $\alpha$ -aminophosphonate functionalized chitosan sorbents: Effect of methyl vs phenyl group on uranium sorption. *Chem. Eng. J.* **2018**, *352*, 1022-1034.
25. Cheira, M. F.; Kouraim, M. N.; Zidan, I. H.; Mohamed, W. S.; Hassanein, T. F., Adsorption of U(VI) from sulfate solution using montmorillonite/polyamide and nano-titanium oxide/polyamide nanocomposites. *J. Environ. Chem. Eng.* **2020**, *8*, (5), Art. N°104427.
26. Liu, H.-J.; Jing, P.-F.; Liu, X.-Y.; Du, K.-J.; Sun, Y.-K., Synthesis of beta-cyclodextrin functionalized silica gel and its application for adsorption of uranium(VI). *J. Radioanal. Nucl. Chem.* **2016**, *310*, (1), 263-270.
27. Wang, Y.; Li, Y.; Li, L.; Kong, F.; Lin, S.; Wang, Z.; Li, W., Preparation of three-dimensional fiber-network chitosan films for the efficient treatment of uranium-contaminated effluents. *Water Sci. Technol.* **2020**, *81*, (1), 52-61.
28. Huo, Z.; Zhao, S.; Yi, J.; Zhang, H.; Li, J., Biomass-based cellulose functionalized by phosphonic acid with high selectivity and capacity for capturing U(VI) in aqueous solution. *Appl. Sci.* **2020**, *10*, (16).
29. Xiao, J.; Jing, Y.; Wang, X. Q.; Yao, Y.; Jia, Y. Z., Preconcentration of uranium(VI) from aqueous solution by amidoxime-functionalized microspheres silica material: Kinetics, isotherm and mechanism study. *Chemistryselect* **2018**, *3*, (43), 12346-12356.
30. Nuhanovic, M.; Grebo, M.; Draganovic, S.; Memic, M.; Smjecanin, N., Uranium(VI) biosorption by sugar beet pulp: equilibrium, kinetic and thermodynamic studies. *J. Radioanal. Nucl. Chem.* **2019**, *322*, 2065-2078.
31. Bayramoglu, G.; Arica, M. Y., Polyethylenimine and tris(2-aminoethyl)amine modified p(GA-EGMA) microbeads for sorption of uranium ions: equilibrium, kinetic and thermodynamic studies. *J. Radioanal. Nucl. Chem.* **2017**, *312*, (2), 293-303.
32. Tuzen, M.; Saleh, T. A.; Sari, A.; Naeemullah, Interfacial polymerization of trimesoyl chloride with melamine and palygorskite for efficient uranium ions ultra-removal. *Chem. Eng. Res. Des.* **2020**, *159*, 353-361.
33. Turanov, A. N.; Karandashev, V. K.; Emel'chenko, G. A.; Su, S.; Liu, Q.; Wang, J., Sorption of U(VI) from aqueous solutions by chemically modified *Luffa cylindrica* fibers. *Russ. J. Phys. Chem. A* **2020**, *94*, (7), 1471-1475.
34. Saha, S.; Basu, H.; Rout, S.; Pimple, M. V.; Singhal, R. K., Nano-hydroxyapatite coated activated carbon impregnated alginate: A new hybrid sorbent for uranium removal from potable water. *J. Environ. Chem. Eng.* **2020**, *8*, (4), Art. N° 103999.
35. Ma, D.; Wei, J.; Zhao, Y.; Chen, Y.; Tang, S., The removal of uranium using novel temperature sensitive urea-formaldehyde resin: adsorption and fast regeneration. *Sci. Total Environ.* **2020**, *735*, Art. N° 139399.
36. Liang, L.; Lin, X.; Liu, Y.; Sun, S.; Chu, H.; Chen, Y.; Liu, D.; Luo, X.; Zhang, J.; Shang, R., Carboxymethyl konjac glucomannan mechanically reinforcing gellan gum microspheres for uranium removal. *Int. J. Biol. Macromol.* **2020**, *145*, 535-546.
37. He, D. X.; Tan, N.; Luo, X. M.; Yang, X. C.; Ji, K.; Han, J. W.; Chen, C.; Liu, Y. Q., Preparation, uranium (VI) absorption and reuseability of marine fungus mycelium modified by the bis-amidoxime-based groups. *Radiochim. Acta* **2020**, *108*, (1), 37-49.

38. Amesh, P.; Venkatesan, K. A.; Suneesh, A. S.; Samanta, N., Diethylenetriamine tethered mesoporous silica for the sequestration of uranium from aqueous solution and seawater. *J. Environ. Chem. Eng.* **2020**, *8*, (4), Art. N° 103995.
39. Kolhe, N.; Zinjarde, S.; Acharya, C., Removal of uranium by immobilized biomass of a tropical marine yeast *Yarrowia lipolytica*. *J. Environ. Radioact.* **2020**, 223-224, 106419-106419.
40. Persson, I., Hydrated metal ions in aqueous solution: How regular are their structures? *Pure Appl. Chem.* **2010**, *82*, (10), 1901-1917.
41. Li, K.; Li, M.; Xue, D., Solution-phase electronegativity scale: Insight into the chemical behaviors of metal ions in solution. *J. Phys. Chem. A* **2012**, *116*, (16), 4192-4198.
42. Xu, H. F.; Xu, D. C.; Wang, Y. F., Natural indices for the chemical hardness/softness of metal cations and ligands. *ACS Omega* **2017**, *2*, (10), 7185-7193.
43. Marcus, Y., *Ion Properties*. Marcel Dekker, Inc.: New York, NY, 1997; p 259.
44. Wagman, D. D.; Evans, W. H.; Parker, V. B.; Schumm, R. H.; Nuttall, R. L. *Selected Value of Chemical Thermodynamic Properties - Compounds of Uranium, Protactinium, Thorium, Actinium, and the Alkali Metals*; U.S. Department of Commerce, National Bureau of Standards: Gaithersburg, M.D., USA, 1981; p 149 pp.
45. Gustafsson, J. P. *Visual MINTEQ*, ver. 3.1; KTH, Royal Institute of Technology: Stockholm, Sweden, 2013.
